# Supplementary material for: Suzuki–Miyaura catalyst-transfer polycondensation of triolborate-type fluorene monomer: toward rapid access to polyfluorene-containing block and graft copolymers from various macroinitiators
Source: Royal Society of Chemistry journal article supplement (doi:10.1039/d0py01127d), 2020-01-01
Supplement: d0py01127d1.pdf [file d0py01127d1.pdf]

## Supporting Information

### **Suzuki–Miyaura Catalyst-Transfer Polycondensation of Triolborate-Type Fluorene Monomer: Toward Rapid Access to Polyfluorene-Containing Block and Graft Copolymers from Various Macroinitiators**

#### **Authors**

Saburo Kobayashi,<sup>a</sup> Kaiyu Fujiwara,<sup>a</sup> Dai-Hua Jiang,<sup>a, b, c</sup> Takuya Yamamoto,<sup>d</sup> Kenji Tajima,<sup>d</sup> Yasunori Yamamoto,<sup>d</sup> Takuya Isono,<sup>d, \*</sup> Toshifumi Satoh<sup>d, \*</sup>

#### **Author Affiliation**

<sup>a</sup> Graduate School of Chemical Sciences and Engineering, Hokkaido University, Sapporo 060-8628, Japan

<sup>b</sup> Institute of Organic and Polymeric Materials, Research and Development Center of Smart Textile Technology, National Taipei University of Technology, 10608 Taipei, Taiwan

<sup>c</sup> Institute of Polymer Science and Engineering, National Taiwan University, 106 Taipei, Taiwan

<sup>d</sup> Faculty of Engineering, Hokkaido University, Sapporo 060-8628, Japan

\* To whom correspondence should be addressed: [isono.t@eng.hokudai.ac.jp](mailto:isono.t@eng.hokudai.ac.jp) (T.I.) & [satoh@eng.hokudai.ac.jp](mailto:satoh@eng.hokudai.ac.jp) (T.S.)

## Materials

2-(7-Bromo-9,9-dihexyl-9*H*-fluorene-2-yl)4,4,5,5-tetramethyl-1,2,3-dioxaborolane<sup>1</sup> and tris(dibenzylideneacetone)dipalladium(0)-chloroform adduct (Pd<sub>2</sub>(dba)<sub>3</sub>•CHCl<sub>3</sub>)<sup>2</sup> were prepared according to reported methods. Benzoic acid, 2-bromoisobutyl bromide, *n*-butyl acrylate,  $\epsilon$ -caprolactone ( $\epsilon$ -CL), 18-crown-6-ether (18-crown-6), 1,8-diazabicyclo[5.4.0]-undec-7-ene (DBU), 2,2-diethyl-1,3-propanediol, 4-(dimethylamino)pyridine (DMAP), diphenyl phosphate (DPP), ethyl 2-bromoisobutyrate, ethyl 4-iodobenzoate, 4-hydroxybutyl acrylate, 4'-iodoacetophenone, 4-iodoaniline, 4-iodobenzoyl chloride, 4-iodobenzyl alcohol, 4-iodotoluene, *rac*-lactide (*rac*-LA), *N,N,N',N'',N'''*-pentamethyldiethylenetriamine (PMDETA), styrene, *trans*-2-[3-(4-*tert*-butylphenyl)-2-methyl-2-propylidene]malononitrile, triisopropyl borate, and trimethylolethane were purchased from Tokyo Chemical Industry Co., Ltd. (TCI), and used as received. *n*-Butyllithium (*n*-BuLi; in *n*-hexane as 1.6 mol L<sup>-1</sup> solution), 2,7-dibromo-9,9-dihexylfluorene, potassium hydroxide (KOH), and triethylamine (Et<sub>3</sub>N) were purchased from Kanto Chemical Co., Inc., and used as received. Tri(*t*-butyl)phosphine (*t*-Bu<sub>3</sub>P) and tripotassium phosphate (K<sub>3</sub>PO<sub>4</sub>) were purchased from Fujifilm Wako Pure Chemical Co. and used as received. 4-Iodophenol was purchased from Manac Co., Inc., and used as received. Amberlyst® A21, copper (I) bromide (CuBr), (4-iodophenylethynyl)trimethylsilane, and poly(ethylene oxide) monomethyl ether ( $M_{n,NMR} = 5,000 \text{ g mol}^{-1}$ ) were purchased from Sigma-Aldrich Chemicals Co. and used as received. *rac*-Lactide (*rac*-LA; TCI, >98%) was purified by recrystallization (twice) from dry toluene and stored in a glovebox. DBU,  $\epsilon$ -CL, and styrene were purified by distillation over CaH<sub>2</sub> under reduced pressure and stored in a glovebox.

Commercially-available dry-CH<sub>2</sub>Cl<sub>2</sub>, dry-THF and dry-toluene (Kanto Chemical Co., Inc., >99.5%, water content, <0.001%) was further purified by an MBRAUN MB SPS Compact solvent purification system equipped with a MB-KOL-C column and a MB-KOL-A column, which was then directly used for the polymerizations.

## Instruments

Polymerization was carried out in an MBRAUN stainless steel glovebox equipped with a gas purification system (molecular sieves and a copper catalyst) under a dry argon atmosphere ( $\text{H}_2\text{O}$ ,  $\text{O}_2 < 0.1$  ppm). The moisture and oxygen contents in the glovebox were monitored by an MB-MO-SE 1 moisture sensor and an MB-OX-SE 1 oxygen sensor, respectively.

$^1\text{H}$  (400 MHz) and  $^{13}\text{C}$  NMR (100 MHz) spectra were obtained using a JEOL JNM-ECS400 instrument at 25 °C.

DOSY NMR measurement was performed at 30 °C on a JEOL JNM-ECZ600R NMR spectrometer operating at 600 MHz and equipped with a ROYAL probe (NM100006) capable of producing gradients in the z direction with strength  $90 \text{ G cm}^{-1}$ . The pulse sequence used was stimulated-echo and longitudinal eddy current delay. The gradient strength was logarithmically incremented in 16 steps from 50 mT up to 200 mT of the maximum gradient strength. The gradient duration was 2 ms and the diffusion delay was 0.1 s. The spectra were collected with a spectral window from  $-2.5$  to  $12.5$  ppm in 8 transients and with 4 dummy transients in the beginning, with an acquisition time of 3 s and relaxation delay of 15 s.

Size exclusion chromatography (SEC) was performed at 40 °C using a Jasco high-performance liquid chromatography system (PU-2080Plus Intelligent HPLC pump, CO-2065Plus Column oven, RI-2031Plus Intelligent RI detector, and Shodex DG-2080-54) equipped with a Shodex KF-G guard column ( $4.6 \text{ mm} \times 10 \text{ mm}$ ; particle size,  $8 \mu\text{m}$ ) and two Shodex KF-804 columns (linear; particle size,  $7 \mu\text{m}$ ;  $8.0 \text{ mm} \times 300 \text{ mm}$ ; exclusion limit,  $4 \times 10^5$ ) in THF at a flow rate of  $1.0 \text{ mL min}^{-1}$ . The number-average molecular weight ( $M_{n,\text{SEC}}$ ) and dispersity ( $D_M$ ) of the polymer were calculated on the basis of a polystyrene calibration.

Matrix-assisted laser desorption ionization time-of-flight mass spectrometry (MALDI-TOF MS) measurement of the polymer was carried out in the reflector mode using an ABSCIEX TOF/TOF/5800 equipped with a 337 nm nitrogen laser (3 ns pulse width). The MALDI-TOF MS samples were prepared by depositing a mixture of the polymer and matrix in THF onto a sample plate. A 1:80 (v/v) ratio of [PF ( $1.0 \text{ g L}^{-1}$  in THF)]/[*trans*-2-[3-(4-*tert*-butylphenyl)-2-methyl-2-propylidene]malononitrile ( $10 \text{ g L}^{-1}$  in THF)] was used.

## Synthesis of potassium 2-(7-bromo-9,9-dihexyl-9H-fluorene-2-yl)triolborate

### Scheme S1. Synthesis of triolborate salt fluorene monomer

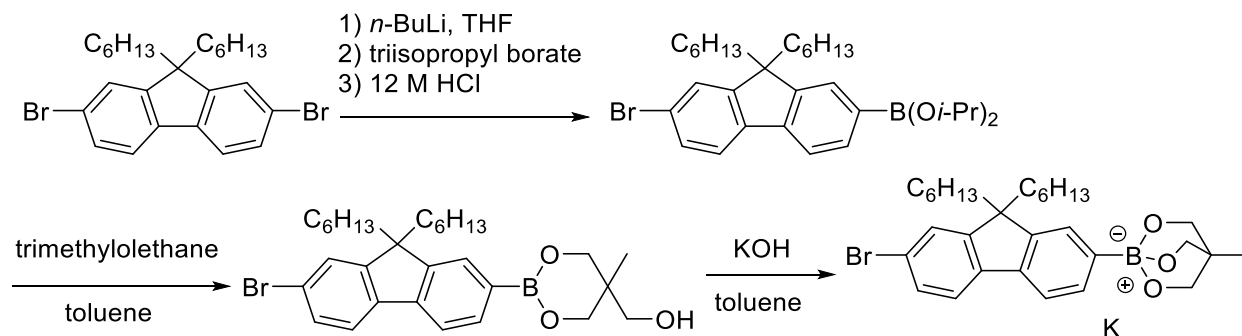

To a 500 mL three-necked round bottom flask, 2,7-dibromo-9,9-dihexylfluorene (40.0 g, 81.2 mmol) was added and dried under vacuum at room temperature for 6 h. Dry-THF (320 mL) was introduced to this flask and cooled to  $-78\text{ }^{\circ}\text{C}$ . *n*-BuLi (50.8 mL, 81.2 mmol,  $1.6\text{ mol L}^{-1}$  in *n*-hexane) was injected slowly via a syringe, and the whole mixture was stirred for 1.5 h under argon atmosphere. Triisopropyl borate (28.0 mL, 121.9 mmol) was then added to this reaction mixture. The mixture was gradually brought back to room temperature and stirred for 9 h under argon atmosphere. The reaction was quenched by the addition of  $12\text{ mol L}^{-1}$  HCl (30 mL). The solvent was removed by evaporation, and the residue was dissolved in  $\text{CH}_2\text{Cl}_2$  and washed with brine. The organic layer was dried over  $\text{Na}_2\text{SO}_4$  and evaporated completely. The residue was purified by silica gel column chromatography (*n*-hexane  $\rightarrow$  MeOH) to give 2-(7-bromo-9,9-dihexyl-9H-fluorene-2-yl)diisopropyl boronate (41.7 g, 90.5% yield) as a white powder.

2-(7-Bromo-9,9-dihexyl-9H-fluorene-2-yl)diisopropyl boronate (30.0 g, 55.4 mmol) and trimethylolethane (6.7 g, 55.4 mmol) were then dissolved in toluene (150 ml). Isopropanol was removed by azeotropic distillation for 4 h by a Dean-Stark apparatus. Then, KOH (3.1 g, 55.4 mmol) was added, and the mixture was refluxed for 4 h. The precipitate was collected by filtration, washed with cyclohexane, and dried under reduced pressure to give 2-(7-bromo-9,9-dihexyl-9H-fluorene-2-yl)triolborate (25.7 g, 44.3 mmol, 80% yield) as a yellow solid.

$^1\text{H}$  NMR (400 MHz,  $\text{DMSO-}d_6$ ):  $\delta$  (ppm) 7.93–7.77 (m, Ar-*H*), 7.75–7.57 (m, Ar-*H*), 7.50 (d, Ar-*H*), 3.56 (s,  $-\text{O}(\text{CH}_2)_3\text{CCH}_3$ ), 2.12 (br,  $-\text{CH}_2(\text{CH}_2)_4\text{CH}_3$ ), 1.36–0.66 (m,  $-\text{CH}_2(\text{CH}_2)_4\text{CH}_3$ ), 0.47 (s,  $-\text{O}(\text{CH}_2)_3\text{CCH}_3$ ).

$^{13}\text{C}$  NMR (100 MHz,  $\text{DMSO-}d_6$ ):  $\delta$  (ppm) 150, 147.8, 141.0, 140, 137.9, 134.8, 133.5, 131.4, 130.6, 129.6, 128.4, 122.5, 69.1, 52.6, 43.9, 32.9, 31.8, 29.9, 24.4, 22.7, 14.9, 14.1.

HRMS (ESI):  $m/z$  calcd for  $\text{C}_{30}\text{H}_{41}\text{BO}_3\text{Br}^-$ : 539.2337; found: 539.23407 [ $\text{M-K}$ ] $^-$

## Synthesis of 4-iodobenzyl 2-bromo-2-methylpropanoate

### Scheme S2. Synthesis of iodobenzene-functionalized ATRP initiator

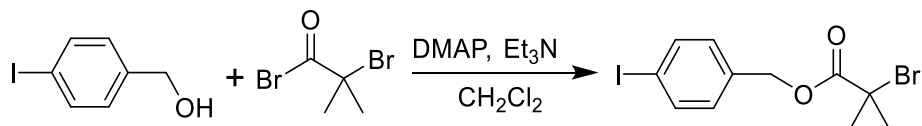

4-Iodobenzyl alcohol (10 g, 42.7 mmol), DMAP (260 mg, 2.1  $\mu$ mol), and Et<sub>3</sub>N (7.7 mL, 55.5 mmol) in dry-CH<sub>2</sub>Cl<sub>2</sub> was added 2-bromo-2-dimethylpropionyl bromide (6.3 mL, 51.3 mmol). After stirring at room temperature for 2 h, the reaction mixture was filtered, and the filtrate was washed with saturated Na<sub>2</sub>CO<sub>3</sub> and 1 mol L<sup>-1</sup> HCl solutions. The combined organic layers were then dried over MgSO<sub>4</sub> and evaporated to dryness to give 4-iodobenzyl 2-bromo-2-methylpropanoate (13.1 g, 80% yield) as a white solid.

<sup>1</sup>H NMR (CDCl<sub>3</sub>, 400 MHz):  $\delta$  (ppm) 7.22-7.49 (m, Ar-H), 5.13 (s, 2H, -CH<sub>2</sub>O-), 1.92 (s, 6H, -CH<sub>3</sub>).

<sup>13</sup>C NMR (CDCl<sub>3</sub>, 100 MHz):  $\delta$  (ppm) 171.3, 134.4, 131.8, 129.6, 122.4, 66.75, 55.50, 30.74.

HRMS (EI):  $m/z$  calcd for C<sub>11</sub>H<sub>12</sub>O<sub>2</sub>BrI: 381.9065; found: 381.90496 [M<sup>+</sup>]

## Synthesis of iodobenzene-terminated poly(*rac*-lactide)

### Scheme S3. Synthesis of iodobenzene-terminated poly(*rac*-lactide)

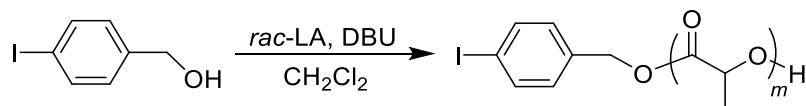

In the glovebox, DBU (51.9  $\mu\text{L}$ , 347  $\mu\text{mol}$ , 1.0 eq.) was added to a stirred solution of the 4-iodobenzyl alcohol (81.2 mg, 347  $\mu\text{mol}$ , 1.0 eq.) and *rac*-LA (2.50 g, 17.35 mmol, 50 eq.) in dry- $\text{CH}_2\text{Cl}_2$  (25 mL). After 10 min, an excess of benzoic acid (ca. 500 mg) was added to the reaction mixture to terminate the polymerization. The mixture was purified by reprecipitation using THF as a good solvent and cold MeOH as a poor solvent to give iodobenzene-terminated poly(*rac*-lactide) (**PLA-I**; 1.81 g, 72.6% yield) as a white powder.

$M_{n,\text{SEC}} = 5,800 \text{ g mol}^{-1}$  (THF);  $M_{n,\text{NMR}} = 6,000 \text{ g mol}^{-1}$  ( $\text{CDCl}_3$ ),  $D_M = 1.06$ .

$^1\text{H NMR}$  (400 MHz,  $\text{CDCl}_3$ ):  $\delta$  (ppm) 7.75 (m, Ar-*H*), 5.19 (m,  $-\text{CH}_2\text{O}-$ ,  $-\text{C}(=\text{O})\text{CHCH}_3\text{O}-$ ), 4.40–4.25 (m,  $-\text{C}(=\text{O})\text{CHCH}_3\text{OH}$ ), 1.58 (m,  $-\text{C}(=\text{O})\text{CHCH}_3\text{O}-$ ).

## Synthesis of iodobenzene-terminated poly( $\epsilon$ -caprolactone)

### Scheme S4. Synthesis of iodobenzene-terminated poly( $\epsilon$ -caprolactone)

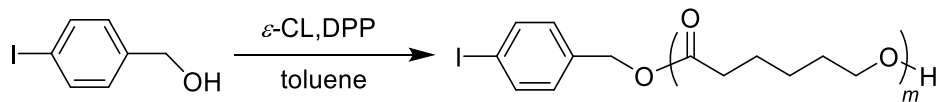

In the glovebox, DPP (73.1 mg, 292  $\mu$ mol, 0.8 eq.) was added to a stirred solution of the 4-iodobenzyl alcohol (85.4 mg, 365  $\mu$ mol, 1.0 eq.) and  $\epsilon$ -CL (2.50 g, 21.9 mmol, 60 eq.) in dry-toluene (25 mL). After 6 h, an excess of Amberlyst® A21 was added to the reaction mixture to terminate the polymerization. The mixture was purified by reprecipitation using THF as a good solvent and cold MeOH as a poor solvent to give iodobenzene-terminated poly( $\epsilon$ -caprolactone) (**PCL-I**; 1.91 g, 76.5% yield) as a white powder.

$M_{n,SEC} = 6,500 \text{ g mol}^{-1}$  (THF);  $M_{n,NMR} = 6,700 \text{ g mol}^{-1}$  ( $\text{CDCl}_3$ ),  $D_M = 1.07$ .

$^1\text{H NMR}$  (400 MHz,  $\text{CDCl}_3$ ):  $\delta$  (ppm) 7.75 (m, Ar-H), 5.19 (s,  $-\text{CH}_2\text{O}-$ ), 4.06 (t,  $-\text{COCH}_2-$ ), 3.65 (m,  $-\text{CH}_2\text{OH}$ ), 2.31 (t,  $-\text{C}(=\text{O})\text{CH}_2-$ ), 1.60–1.70 (m,  $-\text{C}(=\text{O})\text{CH}_2\text{CH}_2\text{CH}_2\text{CH}_2\text{CH}_2\text{O}-$ ), 1.37 (m,  $-\text{CO}(\text{CH}_2)_2\text{CH}_2(\text{CH}_2)_2\text{O}-$ ).

## Synthesis of iodobenzene-terminated polystyrene

### Scheme S5. Synthesis of iodobenzene-terminated polystyrene

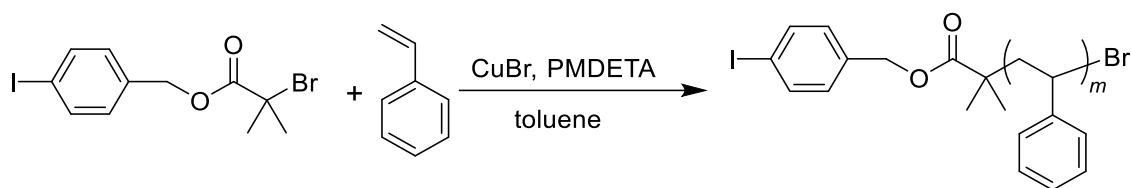

CuBr (230 mg, 1.60 mmol, 1.0 eq.) was evacuated for 30 min in a Schlenk flask and backfilled with argon. Styrene monomer was passed through a basic Al<sub>2</sub>O<sub>3</sub> column in order to remove the inhibitor. A mixture of styrene monomer (5.0 g, 48.0 mmol, 30 eq.), PMDETA (334  $\mu$ L, 1.60 mmol, 1.0 eq.), and 4-iodobenzyl 2-bromo-2-methylpropanoate (613 mg, 1.60 mmol, 1.0 eq.) in dry-toluene was subjected to three freeze-pump-thaw cycles. Next, the liquid mixture was transferred to the Schlenk flask containing CuBr for the polymerization. The polymerization was performed in a preheated oil bath at 50 °C, and the monomer conversion was monitored by <sup>1</sup>H NMR at different polymerization time interval. The polymerization was terminated by bubbling air into the solution. The crude product was passed through a neutral Al<sub>2</sub>O<sub>3</sub> column and eluted with THF to remove the catalyst. The mixture was purified by reprecipitation using THF as a good solvent and cold MeOH as a poor solvent to give iodobenzene-terminated polystyrene (**PSt-I**; 2.70 g, 53.9% yield) as white powder.

$M_{n,SEC} = 2,500 \text{ g mol}^{-1}$  (THF);  $M_{n,NMR} = 2,150 \text{ g mol}^{-1}$  (CDCl<sub>3</sub>),  $D_M = 1.17$ .

<sup>1</sup>H NMR (CDCl<sub>3</sub>, 400 MHz):  $\delta$  (ppm) 7.22–7.49 (m, Ar-H), 6.49–6.39 (m, Ar-H), 5.13 (s, 2H, -CH<sub>2</sub>O-), 2.00–1.54 (s, 2H, Ar-CH<sub>2</sub>-), 1.92 (s, 6H, -CH<sub>3</sub>).



## Synthesis of iodobenzene-terminated poly(ethylene oxide)

### Scheme S6. Synthesis of iodobenzene-terminated poly(ethylene oxide)

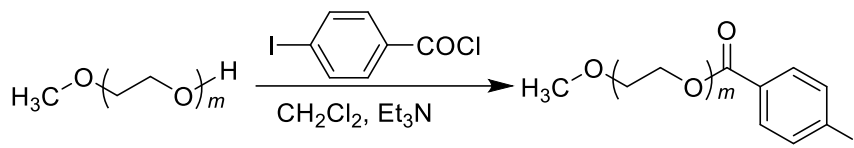

Poly(ethylene oxide) monomethyl ether ( $M_{n,\text{NMR}} = 5,000 \text{ g mol}^{-1}$ , 1.0 g, 0.20 mmol) was added to a 200 mL three-necked flask and was dried under vacuum at room temperature for 9 h. A solution of 4-iodobenzoyl chloride (60 mg, 0.22 mmol) and  $\text{Et}_3\text{N}$  (35  $\mu\text{L}$ , 0.25 mmol) in dry- $\text{CH}_2\text{Cl}_2$  (50 mL) was degassed by bubbling with Ar gas for 30 min, then it was transferred to the three-necked flask using a cannula. After stirring at room temperature for 24 h, the reaction mixture was filtered, and the filtrate was washed with saturated  $\text{Na}_2\text{CO}_3$  and 1 mol  $\text{L}^{-1}$  HCl solutions. The organic layer was concentrated by rotary evaporation, and the residue was precipitated using THF as a good solvent and cold *n*-hexane as a poor solvent to give iodobenzene-terminated poly(ethylene oxide) (**PEO-I**; 1.04 g, 99.5% yield) as a white powder.

$M_{n,\text{SEC}} = 3,100 \text{ g mol}^{-1}$  (THF);  $M_{n,\text{NMR}} = 5,300 \text{ g mol}^{-1}$  ( $\text{CDCl}_3$ ),  $D_M = 1.25$ .

$^1\text{H NMR}$  (400 MHz,  $\text{CDCl}_3$ ):  $\delta$  (ppm) 7.75 (m, Ar-H), 3.67–3.56 (m,  $-\text{CH}_2\text{CH}_2-$ ,  $-\text{CH}_3$ ).

## Synthesis of linear poly( $\epsilon$ -caprolactone) possessing an iodobenzene moiety each chain end

### Scheme S7. Synthesis of linear PCL possessing an iodobenzene moiety each chain end

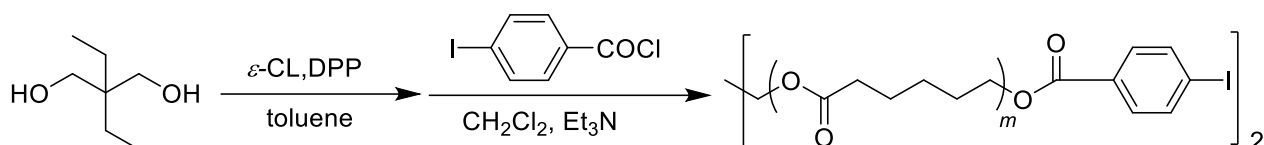

In the glovebox, DPP (146 mg, 584  $\mu\text{mol}$ , 1.6 eq.) was added to a stirred solution of the 2,2-diethyl-1,3-propanediol (48.3 mg, 365  $\mu\text{mol}$ , 1.0 eq.) and  $\epsilon$ -CL (2.50 g, 21.9 mmol, 60 eq.) in dry-toluene (25 mL). After 1.5 h, an excess of Amberlyst® A21 was added to the reaction mixture to terminate the polymerization. The mixture was purified by reprecipitation using THF as a good solvent and cold MeOH as a poor solvent to give linear poly( $\epsilon$ -caprolactone) (1.91 g, 76.5% yield) as a white powder.

Linear poly( $\epsilon$ -caprolactone) ( $M_{n,\text{SEC}} = 8,440 \text{ g mol}^{-1}$ ,  $M_{n,\text{NMR}} = 7,460 \text{ g mol}^{-1}$ ,  $D_M = 1.06$ , 1.0 g, 0.13 mmol) was added to a 20 mL three-necked flask and was dried under vacuum at room temperature for 3 h. A solution of 4-iodobenzoyl chloride (80 mg, 0.29 mmol) and  $\text{Et}_3\text{N}$  (47  $\mu\text{L}$ , 0.34 mmol) in dry- $\text{CH}_2\text{Cl}_2$  (50 mL) was degassed by bubbling with Ar gas for 30 min, and then it was transferred to the three-necked flask using a cannula. After stirring at room temperature for 24 h, the reaction mixture was filtered, and the filtrate was washed with saturated  $\text{Na}_2\text{CO}_3$  and 1 mol  $\text{L}^{-1}$  HCl solutions. The organic layers were concentrated by rotary evaporation, and the residue was precipitated using THF as a good solvent and cold MeOH as a poor solvent to give linear poly( $\epsilon$ -caprolactone) possessing an iodobenzene moiety each chain end ((PCL-I)<sub>2</sub>; 940 mg, 93.9% yield) as a white powder.

$M_{n,\text{SEC}} = 9,400 \text{ g mol}^{-1}$  (THF);  $M_{n,\text{NMR}} = 7,900 \text{ g mol}^{-1}$  ( $\text{CDCl}_3$ ),  $D_M = 1.05$ .

$^1\text{H NMR}$  (400 MHz,  $\text{CDCl}_3$ ):  $\delta$  (ppm) 7.94–7.74 (m, Ar-H), 4.32 (t,  $-\text{CH}_2\text{OBz-I}$ ), 4.07 (t,  $-\text{COCH}_2-$ ), 2.32 (t,  $-\text{C(=O)CH}_2-$ ), 1.70–1.60 (m,  $-\text{C(=O)CH}_2\text{CH}_2\text{CH}_2\text{CH}_2\text{CH}_2\text{O}-$ ), 1.43–1.35 (m,  $-\text{CO}(\text{CH}_2)_2\text{CH}_2(\text{CH}_2)_2\text{O}-$ ,  $-\text{CH}_2\text{CH}_3$ ), 0.84 (s,  $-\text{CH}_3$ ).

## Synthesis of three-armed star-shaped PCL with an iodobenzene moiety at each chain end

### Scheme S8. Synthesis of three-armed star-shaped PCL

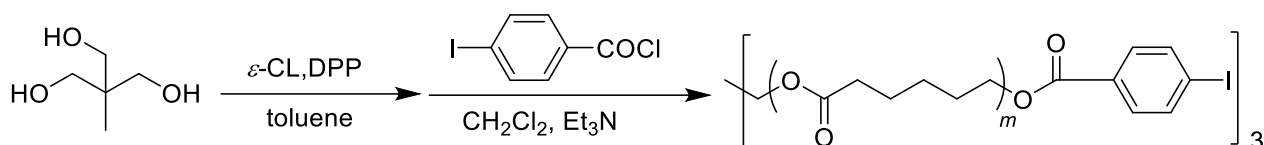

The star-shaped PCL was synthesized by the ring-opening polymerization of  $\epsilon$ -CL (2.50 g, 21.9 mmol, 60 eq.) with trimethylolpropane (43.9 mg, 365  $\mu$ mol, 1.0 eq.), DPP (219 mg, 876  $\mu$ mol, 2.4 eq.) in dry-toluene (25 mL). Then, 4-iodobenzoyl chloride (130 mg, 0.50 mmol), Et<sub>3</sub>N (106  $\mu$ L, 0.76 mmol), and dry-CH<sub>2</sub>Cl<sub>2</sub> (50 mL) were added to the residue, and the solution was stirred at room temperature for 24 h. The reaction mixture was filtered and washed with saturated Na<sub>2</sub>CO<sub>3</sub> and 1 mol L<sup>-1</sup> HCl solutions, and the combined organic layer was concentrated by rotary evaporation. The residue was precipitated using THF as a good solvent and cold MeOH as a poor solvent to give three-armed star-shaped PCL with an iodobenzene moiety at each chain end ((PCL-I)<sub>3</sub>; 930 mg, 71.1% yield) as a white powder.

$M_{n,SEC} = 12,350 \text{ g mol}^{-1}$  (THF);  $M_{n,NMR} = 7,300 \text{ g mol}^{-1}$  (CDCl<sub>3</sub>),  $D_M = 1.05$ .

<sup>1</sup>H NMR (400 MHz, CDCl<sub>3</sub>):  $\delta$  (ppm) 7.94–7.74 (m, Ar-H), 4.30 (t, -CH<sub>2</sub>OBz-I), 4.06 (t, -COCH<sub>2</sub>-), 2.31 (t, -C(=O)CH<sub>2</sub>-), 1.89–1.55 (m, -C(=O)CH<sub>2</sub>CH<sub>2</sub>CH<sub>2</sub>CH<sub>2</sub>CH<sub>2</sub>O-), 1.38 (m, -CO(CH<sub>2</sub>)<sub>2</sub>CH<sub>2</sub>(CH<sub>2</sub>)<sub>2</sub>O-), 1.00 (s, -CH<sub>3</sub>).

## Synthesis of poly(*n*-butyl acrylate) possessing iodobenzene side chain

### Scheme S9. Synthesis of poly(*n*-butyl acrylate) possessing iodobenzene side chain

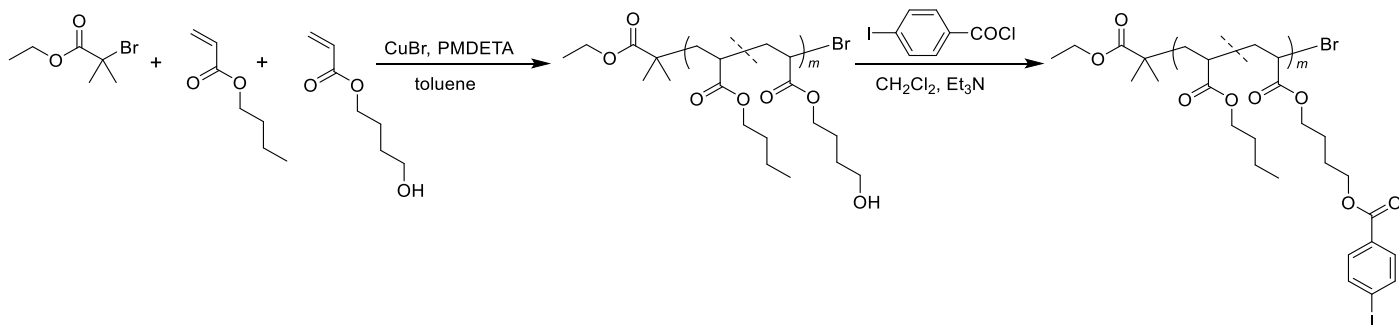

CuBr (336 mg, 2.34 mmol, 1.0 eq.) was evacuated for 30 min in a Schlenk flask and backfilled with argon. *n*-Butyl acrylate and 4-hydroxybutyl acrylate were passed through a basic Al<sub>2</sub>O<sub>3</sub> column in order to remove the inhibitor. A mixture of *n*-butyl acrylate (15 g, 117 mmol, 50 eq.), 4-hydroxybutyl acrylate (1.69 g, 2.34 mmol, 5 eq.), PMDETA (489  $\mu$ L, 2.34 mmol, 1.0 eq.), and ethyl 2-bromoisobutyrate (457 mg, 2.34 mmol, 1.0 eq.) in dry-toluene was subjected to three freeze-pump-thaw cycles. Next, the liquid mixture was transferred to the Schlenk flask containing CuBr for the polymerization. The polymerization was performed in a preheated oil bath at 50 °C, and the monomer conversion was monitored by <sup>1</sup>H NMR at different polymerization time interval. The reaction mixture was quenched in liquid nitrogen and allowed to warm to room temperature. After removing the remaining *n*-butyl acrylate and 4-hydroxy acrylate by evaporation under reduced pressure, 4-iodobenzoyl chloride (55 mg, 2.08 mmol), Et<sub>3</sub>N (229  $\mu$ L, 3.12 mmol), and dry-CH<sub>2</sub>Cl<sub>2</sub> (50 mL) were added to the residue, and the solution was stirred at room temperature for 24 h. The reaction mixture was filtered and washed with saturated Na<sub>2</sub>CO<sub>3</sub> and 1 mol L<sup>-1</sup> HCl solutions, and the combined organic layer was concentrated by rotary evaporation. The residue was precipitated using THF as a good solvent and cold *n*-hexane as a poor solvent to give poly(*n*-butyl acrylate) possessing iodobenzene at the side chain (**P(BA<sub>50-co-BzI4</sub>)**); 6.67 g, 40.0%) as a yellow viscous liquid.

$M_{n,SEC} = 7,630 \text{ g mol}^{-1}$  (THF);  $M_{n,NMR} = 8,100 \text{ g mol}^{-1}$  (CDCl<sub>3</sub>),  $D_M = 1.09$ .

<sup>1</sup>H NMR (CDCl<sub>3</sub>, 400 MHz):  $\delta$  (ppm) 7.94–7.74 (m, Ar-H), 4.35 (t, -CH<sub>2</sub>OBz-I), 4.04 (t, -C(=O)OCH<sub>2</sub>CH<sub>2</sub>-), 2.28 (br, -CH<sub>2</sub>CH-), 1.92 (br, -CH<sub>2</sub>CH-), 1.60–1.38 (m, -(CH<sub>2</sub>)<sub>2</sub>-), 1.24 (t, -CH<sub>2</sub>CH<sub>3</sub>), 1.09 (d, -C(=O)C(CH<sub>3</sub>)<sub>2</sub>-), 0.94 (t, -CH<sub>3</sub>).

**Polymerization of potassium 2-(7-bromo-9,9-dihexyl-9H-fluorene-2-yl)triolborate**  
**Scheme S10. Polymerization of triolborate-type fluorene monomer**

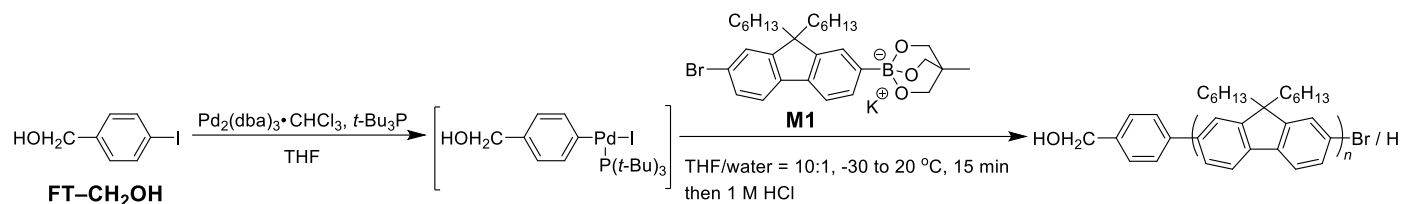

In the glovebox, 4-iodobenzyl alcohol (**FI-CH<sub>2</sub>OH**; 115  $\mu\text{L}$ , 57.5  $\mu\text{mol}$ , as 0.50  $\text{mol L}^{-1}$  stock solution in THF),  $\text{Pd}_2(\text{dba})_3 \cdot \text{CHCl}_3$  (17.9 mg, 17.2  $\mu\text{mol}$ ), and  $t\text{-Bu}_3\text{P}$  (253  $\mu\text{L}$ , 127  $\mu\text{mol}$ , as 0.5  $\text{mol L}^{-1}$  stock solution in THF) were placed in a vial and dissolved in THF (5 mL), after stirring for 1 h at room temperature. The vial containing the stock solution of the Pd-initiator was sealed and taken out from the glovebox. In a 300 mL recovery flask, a mixture of THF (86 mL) and deionized water (8.6 mL) was deoxygenated by argon bubbling at least for 1 h. The stock solution of the Pd-initiator was transferred to the flask using a cannula under an argon atmosphere, and the entire mixture was cooled to  $-10$  °C. Potassium 2-(7-bromo-9,9-dihexyl-9H-fluorene-2-yl)triolborate (**M1**; 3.45 mL, 0.86 mmol, as 0.25  $\text{mol L}^{-1}$  stock solution in THF) was quickly added to the mixture under an argon atmosphere, and the entire mixture was vigorously stirred for 15 min at  $-10$  °C. To the reaction mixture, 1  $\text{mol L}^{-1}$  HCl (5 mL) was added to terminate the polymerization. The solvent was removed by evaporation, and the residue was dissolved in  $\text{CH}_2\text{Cl}_2$  and washed with brine. The organic layer was dried over  $\text{Na}_2\text{SO}_4$  and concentrated. The mixture was filtered, and the filtrate was evaporated under reduced pressure. The resulting solution was concentrated and precipitated using THF as a good solvent and cold acetone as a poor solvent to give **HOCH<sub>2</sub>-PF**. The polymerization results are listed in **Table 1**.

## Evaluation of the living nature of the SCTP of triolborate salt monomer

### Scheme S11. Post-polymerization experiment for the SCTP

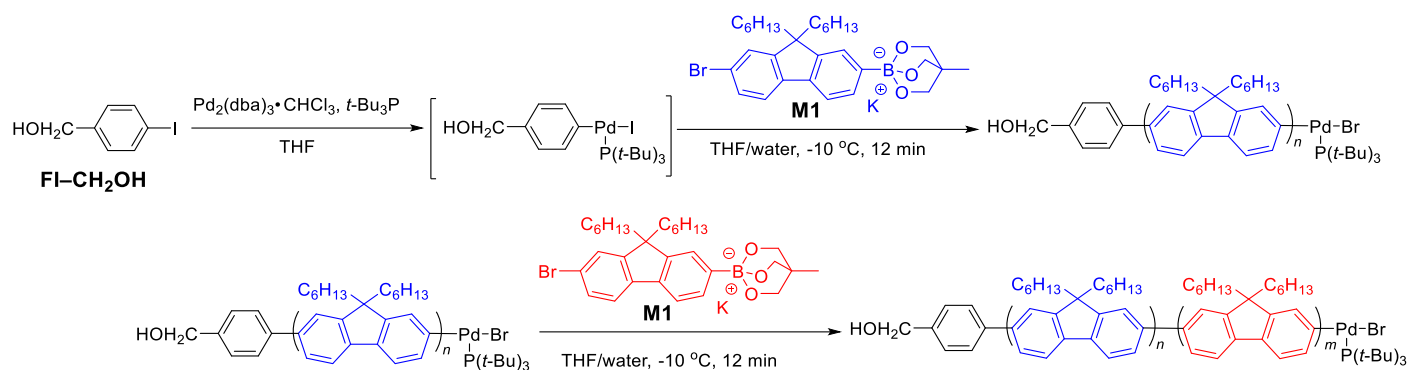

In the glovebox, **FI-CH<sub>2</sub>OH** (1.15 mL, 0.58 mmol, as 0.5 mol L<sup>-1</sup> stock solution in THF), Pd<sub>2</sub>(dba)<sub>3</sub>•CHCl<sub>3</sub> (178.6 mg, 0.173 mmol), and *t*-Bu<sub>3</sub>P (2.53 mL, 1.27 mmol, as 0.5 mol L<sup>-1</sup> stock solution in THF) were placed in a vial and dissolved in THF (15 mL), then stirring for 1 h at room temperature. The vial containing the stock solution of the Pd-initiator was sealed and taken out from the glovebox. In a 1000 mL recovery flask, a mixture of THF (860 mL) and water (86 mL) was deoxygenated by argon bubbling at least for 1 h. The stock solution of the Pd-initiator was transferred to the flask using a cannula under an argon atmosphere, and the entire mixture was cooled to -10 °C. **M1** (34.5 mL, 8.63 mmol, as 0.25 mol L<sup>-1</sup> stock solution in THF) was quickly added to the mixture under an argon atmosphere, and the entire mixture was vigorously stirred for 12 min at -10 °C. Then, **M1** (34.5 mL, 8.63 mmol, as 0.25 mol L<sup>-1</sup> stock solution in THF) was added. A small aliquot (0.3 mL) of the reaction mixture was collected at 0.5, 1.0, 2.0, 5.0, 10, 12.5, 13, 14, 17, and 24 min. Each aliquot was quenched with 1 mol L<sup>-1</sup> HCl solution and extracted with CH<sub>2</sub>Cl<sub>2</sub>. The separated organic layer was evaporated under reduced pressure to get a residue. Half of the residue was dissolved in CDCl<sub>3</sub> to determine the conversion of monomer by <sup>1</sup>H NMR (conversions of 31%, 39%, 65%, 85%, 99%, 119%, 146%, 161%, 176%, and 199% were observed for 0.5, 1.0, 2.0, 5.0, 10, 12.5, 13, 14, 17, and 24 min, respectively). The other half of the residue was dissolved in THF, and the solution was filtered. The filtrate was analyzed by SEC to determine the *M<sub>n</sub>* and *D<sub>M</sub>* values of the polymers. The *M<sub>n,SEC</sub>* (*D<sub>M</sub>*) values of each polymer initiated by Pd<sub>2</sub>(dba)<sub>3</sub>•CHCl<sub>3</sub>/*t*-Bu<sub>3</sub>P/**FI-CH<sub>2</sub>OH** for 0.5, 1.0, 2.0, 5.0, 10, 12.5, 13, 14, 17, and 24 min were 1960 (1.22), 2400 (1.22), 3860 (1.23), 4970 (1.23), 5760 (1.23), 6940 (1.25), 8450 (1.25), 9280 (1.26), 9850 (1.27), and 11460 g mol<sup>-1</sup> (1.28) respectively. The polymerization results are listed in **Table S1**.

**Table S1.** Monomer conversion, molecular weight, and dispersity at each reaction time<sup>a</sup>

| reaction time (min) | conversion (%) | $M_{n,SEC}^b$ (g mol <sup>-1</sup> ) | $D_M^b$ | $M_{n,NMR}^c$ (g mol <sup>-1</sup> ) |
|---------------------|----------------|--------------------------------------|---------|--------------------------------------|
| 0.5                 | 31             | 2,100                                | 1.22    | 1,960                                |
| 1.0                 | 39             | 2,500                                | 1.22    | 2,400                                |
| 2.0                 | 65             | 3,700                                | 1.23    | 3,860                                |
| 5.0                 | 85             | 5,000                                | 1.23    | 4,970                                |
| 10.0                | 99             | 6,100                                | 1.24    | 5,760                                |
| 12.5                | 119            | 7,100                                | 1.25    | 6,940                                |
| 13.0                | 146            | 8,600                                | 1.25    | 8,450                                |
| 14.0                | 161            | 9,400                                | 1.26    | 9,280                                |
| 17.0                | 176            | 10,000                               | 1.27    | 9,850                                |
| 24.0                | 199            | 12,000                               | 1.28    | 11,460                               |

<sup>a</sup> Polymerization conditions: Ar atmosphere; solvent, THF/water (v/v) = 10:1;  $[M1]_0 = 10$  mmol L<sup>-1</sup>;  $[M1]_0/[FI-CH_2OH]_0/[Pd_2(dba)_3 \cdot CHCl_3]/[t-Bu_3P] = 15:1:0.3:2.2$ . <sup>b</sup> Determined by SEC (PSt standards, THF, 40 °C). <sup>c</sup> Determined by <sup>1</sup>H NMR spectrum in CDCl<sub>3</sub>.

## Molecular weight control

### Scheme S12. Molecular weight control of PF

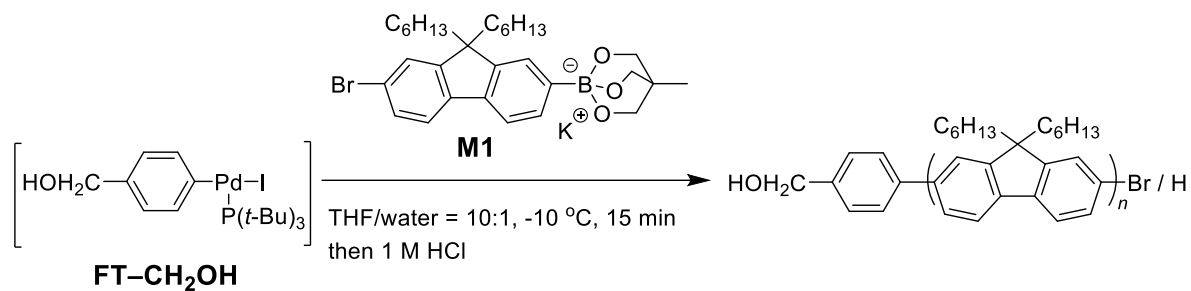

The SCTP of **M1** was conducted with the optimized condition while varying the  $[\mathbf{M1}]_0/[\mathbf{FI-CH_2OH}]_0$  ratio (30:1, 45:1, 90:1, 180:1 and 270:1) for aiming at synthesizing the higher molecular weight PFs. The final product of **HOCH<sub>2</sub>-PF** was obtained as a yellow solid. The polymerization results are listed in **Table 1**.



## Synthesis of $\alpha$ -end-functionalized PFs using functional initiators

### Scheme S13. Polymerization with various initiators

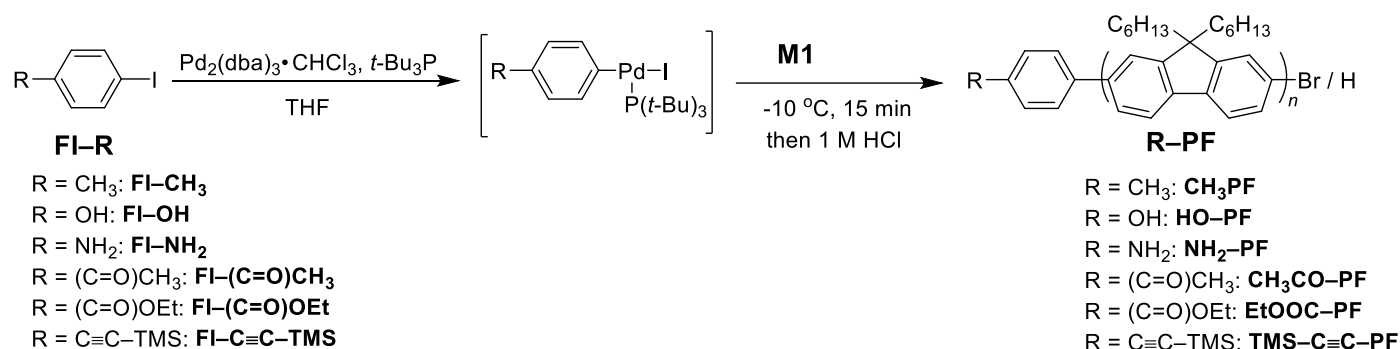

The  $\alpha$ -end-functionalized PF was synthesized by the SCTP of **M1** (3.45 mL, 0.86 mmol, as 0.25 mol L<sup>-1</sup> stock solution in THF) with aryl halide (**FI-R**; 115  $\mu$ L, 57.5  $\mu$ mol, as 0.50 mol L<sup>-1</sup> stock solution in THF), Pd<sub>2</sub>(dba)<sub>3</sub>•CHCl<sub>3</sub> (17.9 mg, 17.2  $\mu$ mol), *t*-Bu<sub>3</sub>P (253  $\mu$ L, 127  $\mu$ mol, as 0.5 mol L<sup>-1</sup> stock solution in THF) in a mixture of THF (86 mL), K<sub>3</sub>PO<sub>4</sub> (18.3 mg, 86.3  $\mu$ mol), and deionized water (8.6  $\mu$ L). The final products of  $\alpha$ -end-functionalized PF was obtained as a yellow solid.

#### $\alpha$ -Methyl-functionalized poly(9,9-dihexyl-2,7-fluorene)

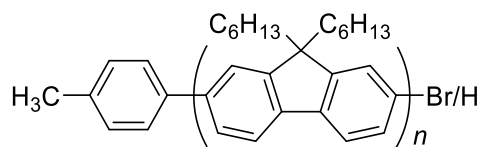

248 mg, 86.8% yield: Yellow solid.  $M_{n,SEC} = 4,800 \text{ g mol}^{-1}$  (THF);  $M_{n,NMR} = 4,400 \text{ g mol}^{-1}$  (CDCl<sub>3</sub>),  $D_M = 1.35$ .

<sup>1</sup>H NMR (400 MHz, CDCl<sub>3</sub>):  $\delta$  (ppm) 7.93–7.77 (m, Ar-*H*), 7.75–7.57 (m, Ar-*H*), 7.50 (d, Ar-*H*), 2.45 (s, –CH<sub>3</sub>), 2.12 (br, –CH<sub>2</sub>(CH<sub>2</sub>)<sub>4</sub>CH<sub>3</sub>), 1.36–0.66 (m, –CH<sub>2</sub>(CH<sub>2</sub>)<sub>4</sub>CH<sub>3</sub>).

#### $\alpha$ -Hydroxyl-functionalized poly(9,9-dihexyl-2,7-fluorene)

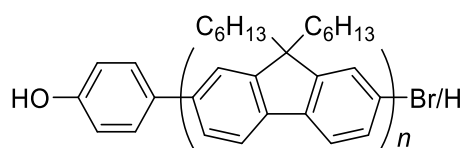

245 mg, 85.8% yield: Yellow solid.  $M_{n,SEC} = 5,100 \text{ g mol}^{-1}$  (THF);  $M_{n,NMR} = 5,300 \text{ g mol}^{-1}$  (CDCl<sub>3</sub>),  $D_M = 1.27$ .

<sup>1</sup>H NMR (400 MHz, CDCl<sub>3</sub>):  $\delta$  (ppm) 7.93–7.77 (m, Ar-*H*), 7.75–7.57 (m, Ar-*H*), 7.50 (d, Ar-*H*), 2.12 (br, –CH<sub>2</sub>(CH<sub>2</sub>)<sub>4</sub>CH<sub>3</sub>), 1.36–0.66 (m, –CH<sub>2</sub>(CH<sub>2</sub>)<sub>4</sub>CH<sub>3</sub>).

$\alpha$ -Amino-functionalized poly(9,9-dihexyl-2,7-fluorene)

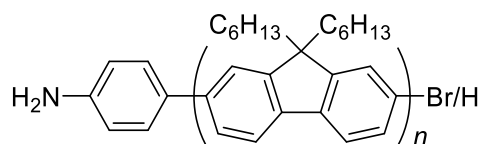

208 mg, 73.0% yield: Yellow solid.  $M_{n,SEC} = 5,000 \text{ g mol}^{-1}$  (THF);  $M_{n,NMR} = 5,100 \text{ g mol}^{-1}$  ( $\text{CDCl}_3$ ),  $D_M = 1.19$ .

$^1\text{H NMR}$  (400 MHz,  $\text{CDCl}_3$ ):  $\delta$  (ppm) 7.93–7.77 (m, Ar-H), 7.75–7.57 (m, Ar-H), 7.50 (d, Ar-H), 2.37 (s, - $\text{CH}_3$ ), 2.12 (br, - $\text{CH}_2(\text{CH}_2)_4\text{CH}_3$ ), 1.36–0.66 (m, - $\text{CH}_2(\text{CH}_2)_4\text{CH}_3$ ).

$\alpha$ -Acetyl-functionalized poly(9,9-dihexyl-2,7-fluorene)

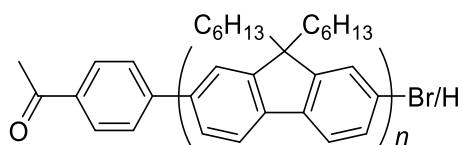

238 mg, 83.3% yield: Yellow solid.  $M_{n,SEC} = 5,300 \text{ g mol}^{-1}$  (THF);  $M_{n,NMR} = 5,700 \text{ g mol}^{-1}$  ( $\text{CDCl}_3$ ),  $D_M = 1.36$ .

$^1\text{H NMR}$  (400 MHz,  $\text{CDCl}_3$ ):  $\delta$  (ppm) 7.93–7.77 (m, Ar-H), 7.75–7.57 (m, Ar-H), 7.50 (d, Ar-H), 3.51 (d, - $\text{COCH}_3$ ), 2.12 (br, - $\text{CH}_2(\text{CH}_2)_4\text{CH}_3$ ), 1.36–0.66 (m, - $\text{CH}_2(\text{CH}_2)_4\text{CH}_3$ ).

$\alpha$ -Ethyl ester-functionalized poly(9,9-dihexyl-2,7-fluorene)

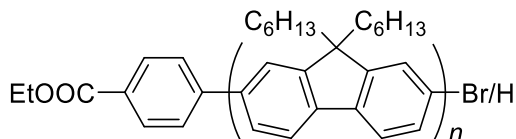

234 mg, 81.7% yield: Yellow solid.  $M_{n,SEC} = 5,200 \text{ g mol}^{-1}$  (THF);  $M_{n,NMR} = 4,100 \text{ g mol}^{-1}$  ( $\text{CDCl}_3$ ),  $D_M = 1.23$ .

$^1\text{H NMR}$  (400 MHz,  $\text{CDCl}_3$ ):  $\delta$  (ppm) 7.93–7.77 (m, Ar-H), 7.75–7.57 (m, Ar-H), 7.50 (d, Ar-H), 4.45 (m, - $\text{CH}_2\text{CH}_3$ ), 2.12 (br, - $\text{CH}_2(\text{CH}_2)_4\text{CH}_3$ ), 1.45 (- $\text{CH}_3$ ), 1.36–0.66 (m, - $\text{CH}_2(\text{CH}_2)_4\text{CH}_3$ ).

$\alpha$ -Trimethylsilylethynyl-functionalized poly(9,9-dihexyl-2,7-fluorene)

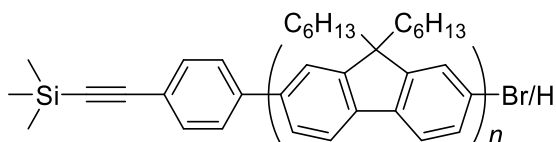

237 mg, 82.8% yield: Yellow solid.  $M_{n,SEC} = 6,000 \text{ g mol}^{-1}$  (THF);  $M_{n,NMR} = 7,700 \text{ g mol}^{-1}$  ( $\text{CDCl}_3$ ),  $D_M = 1.35$ .

$^1\text{H NMR}$  (400 MHz,  $\text{CDCl}_3$ ):  $\delta$  (ppm) 7.93–7.77 (m, Ar-H), 7.75–7.57 (m, Ar-H), 7.50 (d, Ar-H), 2.12 (br, - $\text{CH}_2(\text{CH}_2)_4\text{CH}_3$ ), 1.36–0.66 (m, - $\text{CH}_2(\text{CH}_2)_4\text{CH}_3$ ), 0.8 (- $\text{Si-C}\equiv\text{C-(CH}_3)_3$ ).

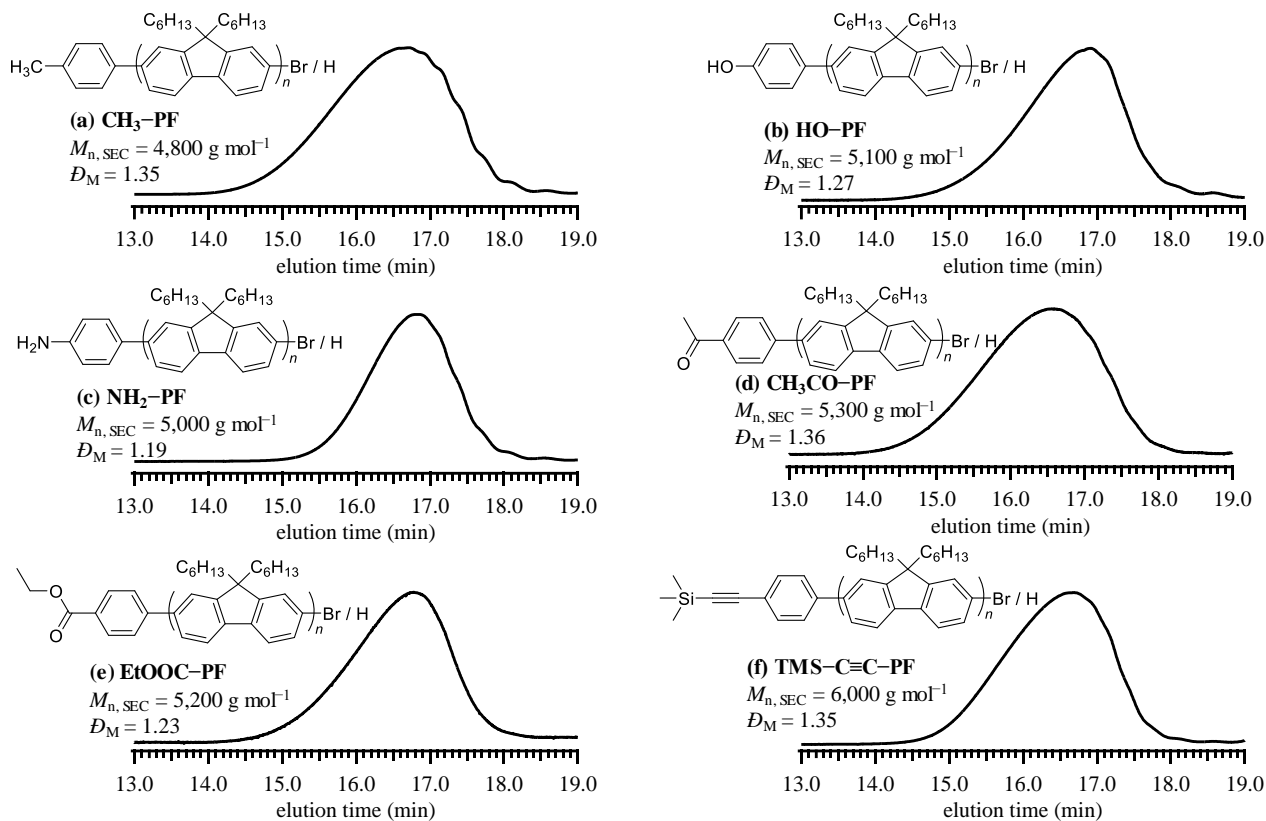

**Figure S1.** SEC traces of (a) CH<sub>3</sub>-PF, (b) HO-PF, (c) H<sub>2</sub>N-PF, (d) CH<sub>3</sub>CO-PF, (e) EtOOC-PF, and (f) TMS-C≡C-PF detected by RI detector (eluent, THF; flow rate 1.0 mL min<sup>-1</sup>).

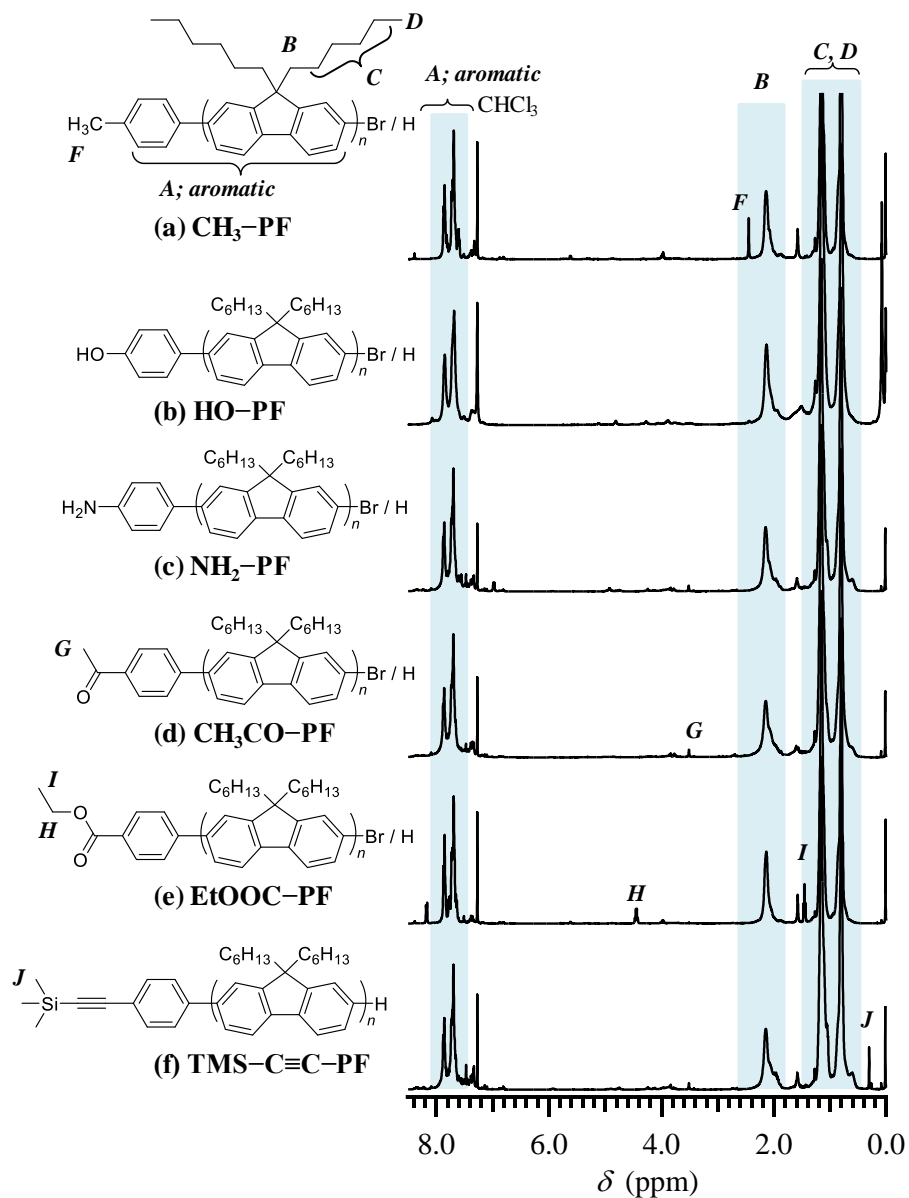

**Figure S2.**  $^1\text{H}$  NMR spectra of (a)  $\text{CH}_3\text{-PF}$ , (b)  $\text{HO-PF}$ , (c)  $\text{H}_2\text{N-PF}$ , (d)  $\text{CH}_3\text{CO-PF}$ , (e)  $\text{EtOOC-PF}$ , and (f)  $\text{TMS-C}\equiv\text{C-PF}$  (solvent,  $\text{CDCl}_3$ ).

**(a) CH<sub>3</sub>-PF**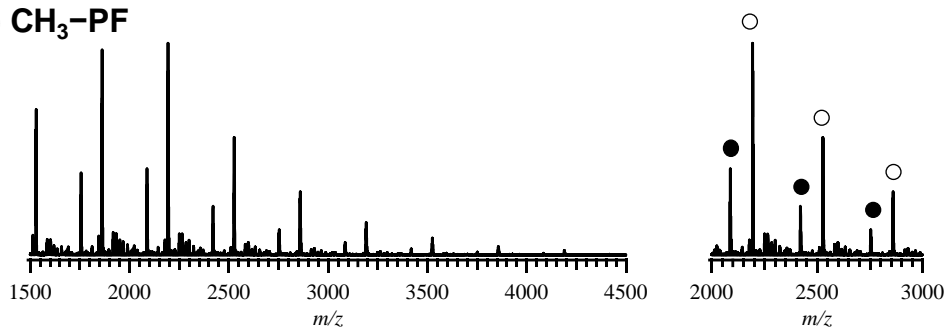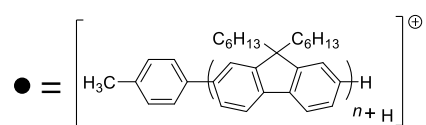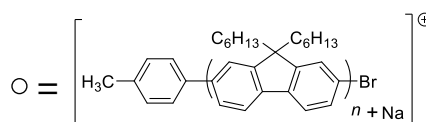

|       | $n = 6$ | $n = 7$ | $n = 8$ |
|-------|---------|---------|---------|
| Clcd. | 2085.57 | 2417.82 | 2750.07 |
| Found | 2085.54 | 2418.65 | 2750.90 |

|       | $n = 6$ | $n = 7$ | $n = 8$ |
|-------|---------|---------|---------|
| Clcd. | 2186.47 | 2518.72 | 2850.97 |
| Found | 2185.60 | 2519.66 | 2850.19 |

**(b) HO-PF**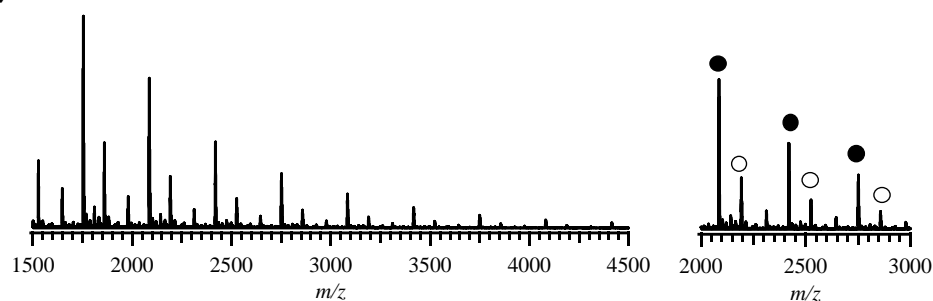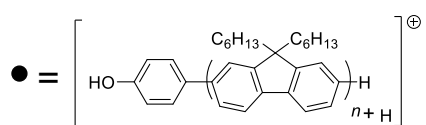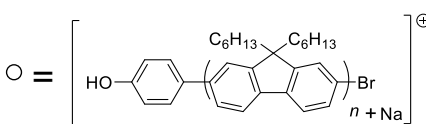

|       | $n = 6$ | $n = 7$ | $n = 8$ |
|-------|---------|---------|---------|
| Clcd. | 2087.54 | 2419.79 | 2752.05 |
| Found | 2087.62 | 2419.90 | 2752.57 |

|       | $n = 6$ | $n = 7$ | $n = 8$ |
|-------|---------|---------|---------|
| Clcd. | 2188.44 | 2520.70 | 2852.95 |
| Found | 2188.66 | 2520.94 | 2852.10 |

**(c) NH<sub>2</sub>-PF**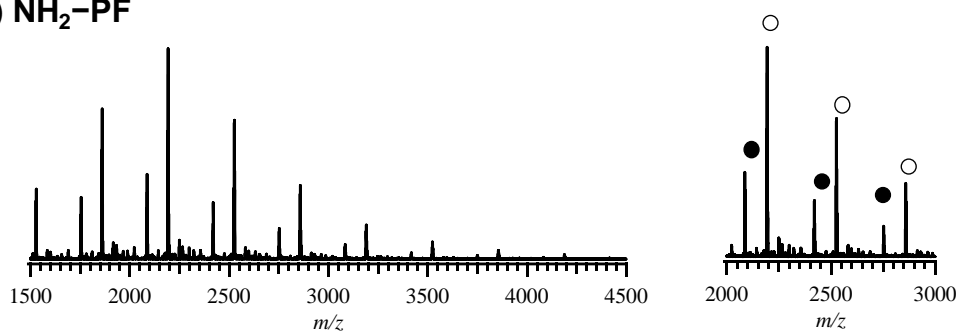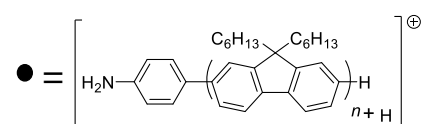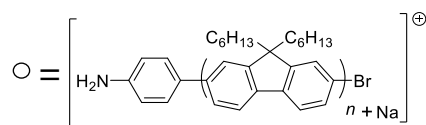

|       | $n = 6$ | $n = 7$ | $n = 8$ |
|-------|---------|---------|---------|
| Clcd. | 2086.00 | 2418.81 | 2751.06 |
| Found | 2087.52 | 2418.85 | 2751.12 |

|       | $n = 6$ | $n = 7$ | $n = 8$ |
|-------|---------|---------|---------|
| Clcd. | 2187.46 | 2519.71 | 2851.96 |
| Found | 2189.04 | 2520.00 | 2852.50 |

**Figure S3 (continue)**

(d) CH<sub>3</sub>CO-PF

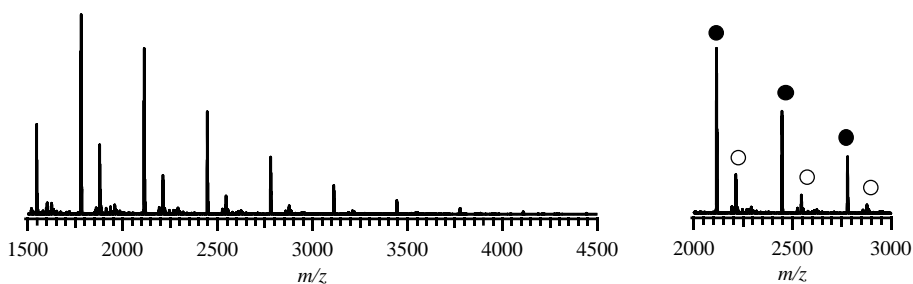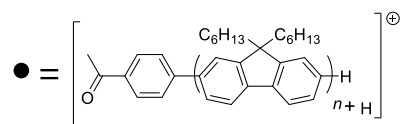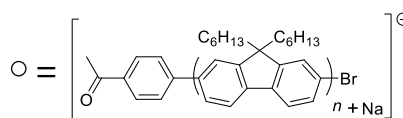

|       | <i>n</i> = 6 | <i>n</i> = 7 | <i>n</i> = 8 |
|-------|--------------|--------------|--------------|
| Clcd. | 2113.56      | 2445.81      | 2778.06      |
| Found | 2113.56      | 2445.76      | 2778.14      |

|       | <i>n</i> = 6 | <i>n</i> = 7 | <i>n</i> = 8 |
|-------|--------------|--------------|--------------|
| Clcd. | 2211.78      | 2543.97      | 2875.65      |
| Found | 2211.46      | 2544.71      | 2876.96      |

(e) EtOOC-PF

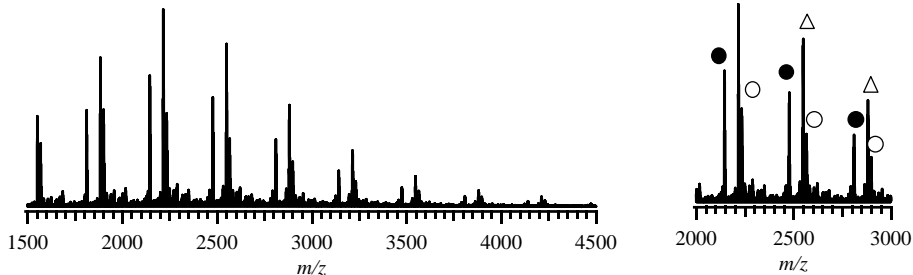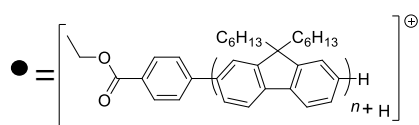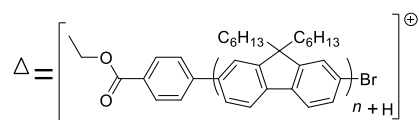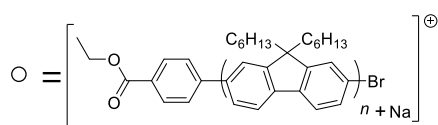

|       | <i>n</i> = 6 | <i>n</i> = 7 | <i>n</i> = 8 |
|-------|--------------|--------------|--------------|
| Clcd. | 2097.57      | 2429.82      | 2762.07      |
| Found | 2097.54      | 2429.81      | 2762.10      |

|       | <i>n</i> = 6 | <i>n</i> = 7 | <i>n</i> = 8 |
|-------|--------------|--------------|--------------|
| Clcd. | 2221.48      | 2553.73      | 2885.98      |
| Found | 2222.66      | 2552.93      | 2886.27      |

|       | <i>n</i> = 6 | <i>n</i> = 7 | <i>n</i> = 8 |
|-------|--------------|--------------|--------------|
| Clcd. | 2244.47      | 2576.72      | 2908.97      |
| Found | 2242.87      | 2575.09      | 2899.45      |

(f) TMS-C≡C-PF

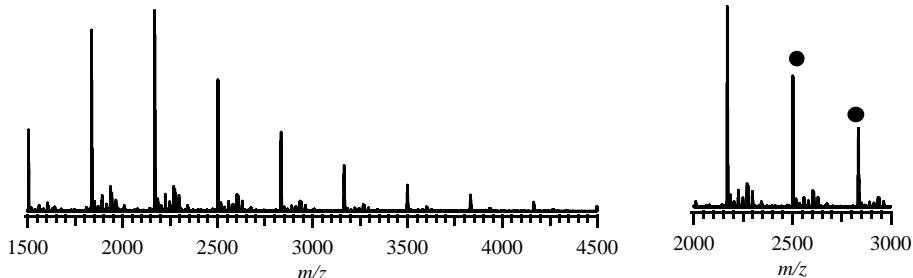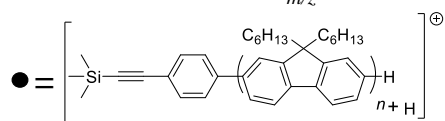

|       | <i>n</i> = 6 | <i>n</i> = 7 | <i>n</i> = 8 |
|-------|--------------|--------------|--------------|
| Clcd. | 2167.59      | 2499.84      | 2832.09      |
| Found | 2168.10      | 2500.87      | 2833.00      |

Figure S3. MALDI-TOF MS spectra of (a) CH<sub>3</sub>-PF, (b) HO-PF, (c) H<sub>2</sub>N-PF, (d) CH<sub>3</sub>CO-PF, (e) EtOOC-PF, and (f) TMS-C≡C-PF.

## Effect of water content in the solvent on the polymerization properties

### Scheme S14. Polymerization in THF/water cosolvent with varied water content

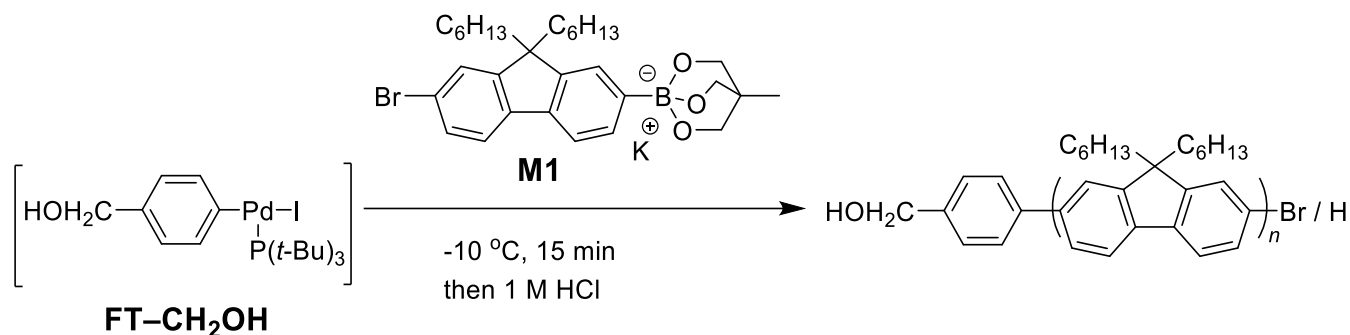

In order to elucidate the effect of water content in the solvent on the polymerization properties, the SCTP of **M1** was performed with varying the THF/water ratio (THF/water (v/v) = 10:1, 100:1, 1000:1 and 5000:1). The final product of **HOCH<sub>2</sub>-PF** was obtained as a yellow solid. The polymerization results are listed in **Table S2**.

**Table S2. Effect of M1 SCTP on varying water content in solvent<sup>a</sup>**

| run            | THF/H <sub>2</sub> O<br>(v/v) | $M_{n,\text{SEC}}^b$<br>(g mol <sup>-1</sup> ) | $M_{n,\text{NMR}}^c$<br>(g mol <sup>-1</sup> ) | $D_M^b$ | yield <sup>d</sup><br>(%) |
|----------------|-------------------------------|------------------------------------------------|------------------------------------------------|---------|---------------------------|
| 1              | 10/1                          | 12,300                                         | 12,600                                         | 1.24    | 83.2                      |
| 2              | 100/1                         | 11,400                                         | 12,400                                         | 1.22    | 85.2                      |
| 3              | 1000/1                        | 11,100                                         | 12,000                                         | 1.22    | 84.3                      |
| 4 <sup>e</sup> | 5000/1                        | 10,500                                         | 11,900                                         | 1.20    | 84.3                      |

<sup>a</sup>Polymerization conditions: Ar atmosphere; temperature, -10 °C;  $[\text{M1}]_0 = 10 \text{ mmol L}^{-1}$ ;  $[\text{FI-CH}_2\text{OH}]_0/[\text{M1}]_0/[\text{Pd}_2(\text{dba})_3 \cdot \text{CHCl}_3]/[t\text{-Bu}_3\text{P}]/[\text{K}_3\text{PO}_4] = 1:30:0.3:2.2:1.5$ . <sup>b</sup>Determined by SEC (PSt standards, THF, 40 °C). <sup>c</sup>Determined by <sup>1</sup>H NMR spectrum in CDCl<sub>3</sub>. <sup>d</sup>Isolated yields. <sup>e</sup>Saturated aqueous solution of K<sub>3</sub>PO<sub>4</sub>.

## The effect of water in the solvent on the block copolymer synthesis

### Scheme S15. The effect of water in the solvent on the PF-*b*-PSt synthesis

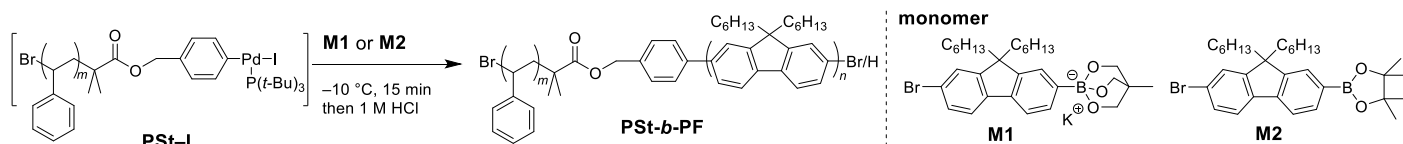

In order to investigate the effect of water content in the solvent on the block copolymer synthesis, polymerizations of **M1** and **M2** was performed while varying the THF/water (v/v) ratio (10:1 and 5000:1). The polymerization results are listed in **Table S3**. The SEC traces of each product and macroinitiators are depicted in **Figure S4**.

**Table S3. SCTP of M1 or M2<sup>a</sup>**

| run            | THF/H <sub>2</sub> O (v/v) | [PSt-I] <sub>0</sub> /[K <sub>3</sub> PO <sub>4</sub> ]/[18-crown-6] | monomer   | $M_{n,SEC}^b$<br>(g mol <sup>-1</sup> ) | $M_{n,NMR}^c$<br>(g mol <sup>-1</sup> ) | $D_M^b$ | yield <sup>d</sup><br>(%) |
|----------------|----------------------------|----------------------------------------------------------------------|-----------|-----------------------------------------|-----------------------------------------|---------|---------------------------|
| 1 <sup>e</sup> | 5000/1                     | 1/1.5/0                                                              | <b>M1</b> | 12,700                                  | 12,700                                  | 1.20    | 87.0                      |
| 2              | 10/1                       | 1/150/0                                                              | <b>M1</b> | —                                       | —                                       | —       | —                         |
| 3 <sup>e</sup> | 5000/1                     | 1/1.5/0                                                              | <b>M2</b> | —                                       | —                                       | —       | —                         |
| 4              | 10/1                       | 1/150/50                                                             | <b>M2</b> | —                                       | —                                       | —       | —                         |

<sup>a</sup> Polymerization conditions: Ar atmosphere;  $[M1]_0 = 10\text{ mmol L}^{-1}$ ;  $[PSt-I]_0/[monomer]_0/[Pd_2(dba)_3 \cdot CHCl_3]/[t-Bu_3P] = 1:15:0.3:2.2$ . <sup>b</sup> Determined by SEC (PSt standards, THF, 40 °C). <sup>c</sup> Determined by <sup>1</sup>H NMR spectrum in CDCl<sub>3</sub>. <sup>d</sup> Isolated yields. <sup>e</sup> Saturated aqueous solution of K<sub>3</sub>PO<sub>4</sub>.

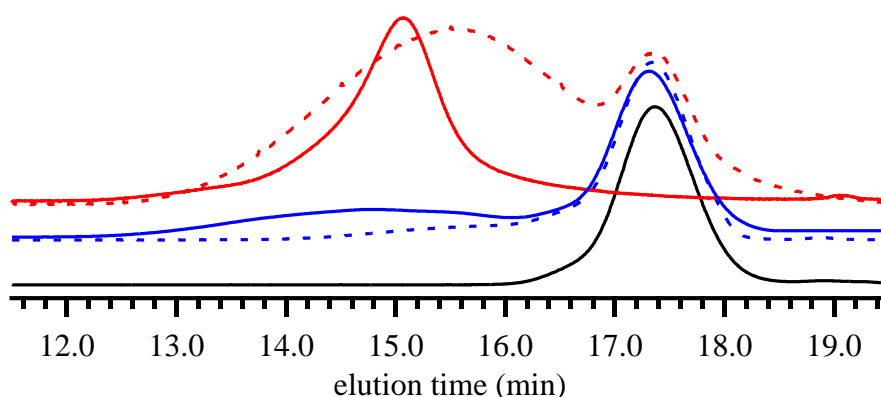

**Figure S4.** SEC traces of the product (red solid line; run 1 in Table S3, red broken line; run 2 in Table S3, blue solid line; run 3 in Table S3, blue broken line; run 4 in Table S3) and corresponding macroinitiator (black line) detected by RI detector (eluent, THF; flow rate, 1.0 mL min<sup>-1</sup>).



## Synthesis of PF-containing diblock copolymers using macroinitiators

### Scheme S16. Synthesis of PF-containing diblock copolymers by SCTP with various macroinitiators

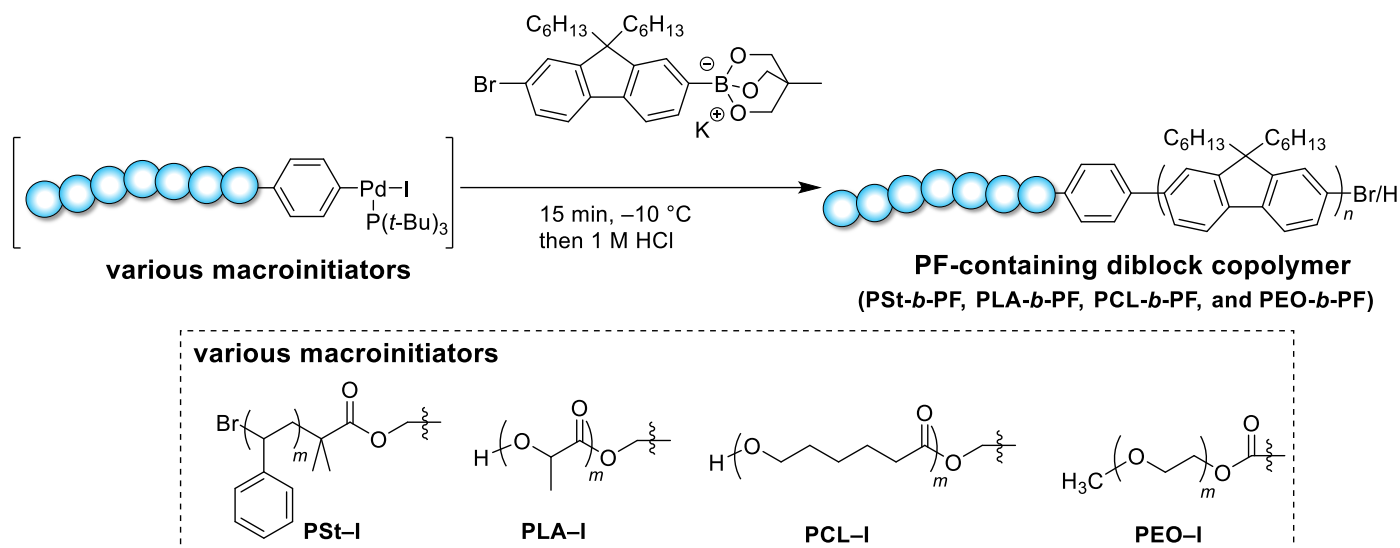

The PF-containing diblock copolymers were synthesized by the SCTP of **M1** (10.4 mL, 2.59 mmol, as 0.25 mol L<sup>-1</sup> stock solution in THF) with the macroinitiators (86.3 μmol, 1.0 eq.; **PSt-I**,  $M_{n,NMR} = 2,150$ ,  $D_M = 1.17$ ; **PLA-I**,  $M_{n,NMR} = 6,000$ ,  $D_M = 1.06$ ; **PCL-I**,  $M_{n,NMR} = 6,700$ ,  $D_M = 1.07$ ; **PEO-I**,  $M_{n,NMR} = 5,300$ ,  $D_M = 1.25$ ), Pd<sub>2</sub>(dba)<sub>3</sub>•CHCl<sub>3</sub> (26.8 mg, 25.9 μmol, 0.5 eq.), and *t*-Bu<sub>3</sub>P (380 μL, 190 μmol, as 0.5 mol L<sup>-1</sup> stock solution in THF, 2.2 eq.) in a mixture of THF (248 mL), K<sub>3</sub>PO<sub>4</sub> (2.7 mg, 13 μmol, 1.5 eq.), and deionized water (50 μL). The resulting solution was concentrated and precipitated using THF as a good solvent and cold mixed solvent of MeOH/acetone (= 1/1 (v/v)) as a poor solvent to give the PF-containing diblock copolymers. The final products were obtained as a yellow solid.

#### PSt-*b*-PF

0.93 g, 87.0% yield: Yellow solid.  $M_{n,SEC} = 12,700\text{ g mol}^{-1}$  (THF);  $M_{n,NMR} = 12,700\text{ g mol}^{-1}$  (CDCl<sub>3</sub>),  $D_M = 1.20$ .

<sup>1</sup>H NMR (400 MHz, CDCl<sub>3</sub>): δ (ppm) 7.93–7.77 (m, Ar-*H*), 7.75–7.57 (m, Ar-*H*), 7.50 (d, Ar-*H*), 7.30–6.30 (m, Ar-*H*), 2.12 (br, -CH<sub>2</sub>(CH<sub>2</sub>)<sub>4</sub>CH<sub>3</sub>), 2.00–1.54 (m, -CHCH<sub>2</sub>-), 1.36–0.66 (m, -CH<sub>2</sub>(CH<sub>2</sub>)<sub>4</sub>CH<sub>3</sub>).

#### PLA-*b*-PF

1.30 g, 90.0% yield: Yellow solid.  $M_{n,SEC} = 16,800\text{ g mol}^{-1}$  (THF);  $M_{n,NMR} = 15,700\text{ g mol}^{-1}$  (CDCl<sub>3</sub>),  $D_M = 1.19$ .

<sup>1</sup>H NMR (400 MHz, CDCl<sub>3</sub>): δ (ppm) 7.93–7.77 (m, Ar-*H*), 7.75–7.57 (m, Ar-*H*), 7.50 (d, Ar-*H*), 5.29–5.11 (m, -COCH(CH<sub>3</sub>)O-), 1.66–1.43 (m, -COCH(CH<sub>3</sub>)O-), 2.12 (br, -CH<sub>2</sub>(CH<sub>2</sub>)<sub>4</sub>CH<sub>3</sub>), 1.36–0.66 (m, -CH<sub>2</sub>(CH<sub>2</sub>)<sub>4</sub>CH<sub>3</sub>).

#### PCL-*b*-PF

1.33 g, 85.0% yield: Yellow solid.  $M_{n,SEC} = 17,700\text{ g mol}^{-1}$  (THF);  $M_{n,NMR} = 16,000\text{ g mol}^{-1}$  (CDCl<sub>3</sub>),  $D_M = 1.11$ .

<sup>1</sup>H NMR (400 MHz, CDCl<sub>3</sub>): δ (ppm) 7.93–7.77 (m, Ar-*H*), 7.75–7.57 (m, Ar-*H*), 7.50 (d, Ar-*H*), 4.06 (t, -COCH<sub>2</sub>-), 3.65 (m, -CH<sub>2</sub>OH), 2.31 (t, -COOCH<sub>2</sub>-), 2.12 (br, -CH<sub>2</sub>(CH<sub>2</sub>)<sub>4</sub>CH<sub>3</sub>), 1.60–1.70 (m, -COCH<sub>2</sub>CH<sub>2</sub>(CH<sub>2</sub>)<sub>2</sub>CH<sub>2</sub>CH<sub>2</sub>O-), 1.37 (m, -CO(CH<sub>2</sub>)<sub>2</sub>CH<sub>2</sub>(CH<sub>2</sub>)<sub>2</sub>O-), 1.36–0.66 (m, -CH<sub>2</sub>(CH<sub>2</sub>)<sub>4</sub>CH<sub>3</sub>).

## PEO-*b*-PF

1.04 g, 67.3% yield: Yellow solid.  $M_{n,SEC} = 10,300 \text{ g mol}^{-1}$  (THF);  $M_{n,NMR} = 14,200 \text{ g mol}^{-1}$  ( $\text{CDCl}_3$ ),  $D_M = 1.50$ .

$^1\text{H NMR}$  (400 MHz,  $\text{CDCl}_3$ ):  $\delta$  (ppm) 7.93–7.77 (m, Ar-*H*), 7.75–7.57 (m, Ar-*H*), 7.50 (d, Ar-*H*), 3.67–3.55 (m,  $-\text{OCH}_2\text{CH}_2-$ ,  $-\text{OCH}_3$ ), 2.12 (br,  $-\text{CH}_2(\text{CH}_2)_4\text{CH}_3$ ), 2.00–1.54 (m,  $-\text{CHCH}_2-$ ), 1.36–0.66 (m,  $-\text{CH}_2(\text{CH}_2)_4\text{CH}_3$ ).

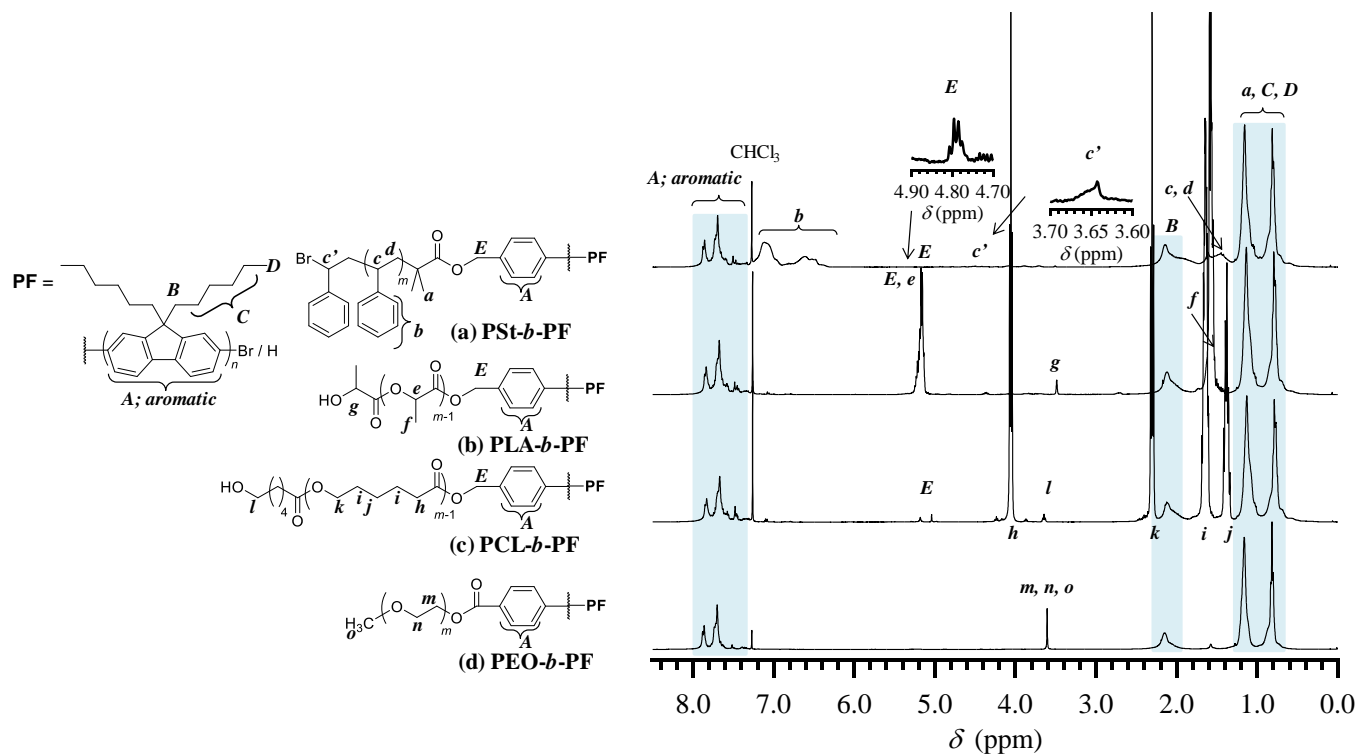

**Figure S5.**  $^1\text{H NMR}$  spectra of (a) **PSt-*b*-PF**, (b) **PLA-*b*-PF**, (c) **PCL-*b*-PF**, and (d) **PEO-*b*-PF** (solvent,  $\text{CDCl}_3$ ).

## Synthesis of PF-containing triblock copolymer using macroinitiator

### Scheme S17. Synthesis of PF-containing triblock copolymer using linear PCL with an iodobenzene moiety at each chain end as the macroinitiator

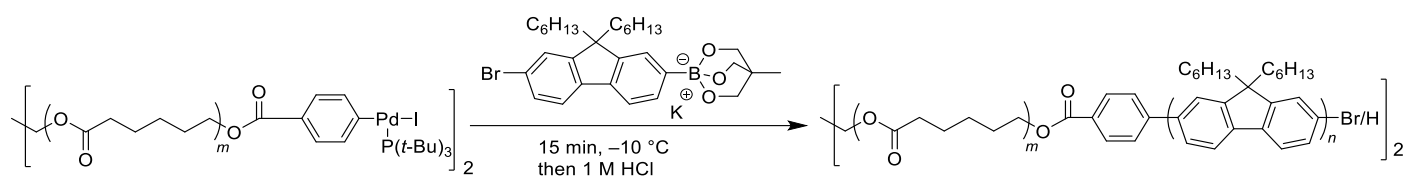

The PF-containing triblock copolymer was synthesized by the SCTP of **M1** (10.4 mL, 2.59 mmol, as 0.25 mol L<sup>-1</sup> stock solution in THF) with the linear PCL possessing an iodobenzene moiety at each chain end (**(PCL-I)**<sub>2</sub>;  $M_{n,\text{NMR}} = 7,900 \text{ g mol}^{-1}$ ,  $D_M = 1.05$ ) as the macroinitiator (68.3 mg, 86.3  $\mu\text{mol}$ , 1.0 eq.),  $\text{Pd}_2(\text{dba})_3 \cdot \text{CHCl}_3$  (8.9 mg, 8.63  $\mu\text{mol}$ , 1.0 eq.), and  $t\text{-Bu}_3\text{P}$  (76  $\mu\text{L}$ , 38  $\mu\text{mol}$ , as 0.5 mol L<sup>-1</sup> stock solution in THF, 4.4 eq.) in a mixture of THF (248 mL),  $\text{K}_3\text{PO}_4$  (5.5 mg, 26  $\mu\text{mol}$ , 3.0, eq.), and deionized water (50  $\mu\text{L}$ ). The final product (**PF-*b*-PCL-*b*-PF**) was obtained as a yellow solid.

#### PF-*b*-PCL-*b*-PF

96.6 mg, 88.5% yield: Yellow solid.  $M_{n,\text{SEC}} = 15,800 \text{ g mol}^{-1}$  (THF);  $M_{n,\text{NMR}} = 17,800 \text{ g mol}^{-1}$  ( $\text{CDCl}_3$ ),  $D_M = 1.10$ .

<sup>1</sup>H NMR (400 MHz,  $\text{CDCl}_3$ ):  $\delta$  (ppm) 7.94–7.74 (m, Ar-*H*), 7.75–7.57 (m, Ar-*H*), 7.50 (d, Ar-*H*), 4.32 (t,  $-\text{CH}_2\text{OBz-I}$ ), 4.07 (t,  $-\text{COCH}_2-$ ), 2.32 (t,  $-\text{COOCH}_2-$ ), 1.70–1.60 (m,  $-\text{C(=O)CH}_2\text{CH}_2\text{CH}_2\text{CH}_2\text{CH}_2\text{O}-$ ), 2.12 (br,  $-\text{CH}_2(\text{CH}_2)_4\text{CH}_3$ ), 1.70–1.60 (m,  $-\text{COCH}_2\text{CH}_2(\text{CH}_2)_2\text{CH}_2\text{CH}_2\text{O}-$ ), 1.43–1.35 (m,  $-\text{CO}(\text{CH}_2)_2\text{CH}_2(\text{CH}_2)_2\text{O}-$ ), 1.36–0.66 (m,  $-\text{CH}_2(\text{CH}_2)_4\text{CH}_3$ ,  $-\text{CH}_3$ ).

## Synthesis of PF-containing star-block copolymer using macroinitiator

### Scheme S18. Synthesis of PF-containing star-block copolymer by SCTP using three-armed star-shaped PCL with an iodobenzene moiety at each chain end as the initiator

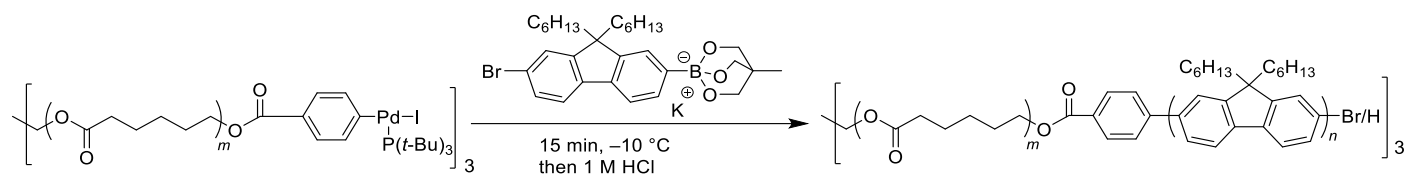

The PF-containing star-block copolymer was synthesized by the SCTP of **M1** (10.4 mL, 2.59 mmol, as 0.25 mol L<sup>-1</sup> stock solution in THF) with the three-armed star-shaped PCL with an iodobenzene moiety at each chain end ((**PCL-I**)<sub>3</sub>;  $M_{n,NMR} = 7,900 \text{ g mol}^{-1}$ ,  $D_M = 1.05$ ) as the macroinitiator (62.9 mg, 86.3  $\mu\text{mol}$ , 1.0 eq.), Pd<sub>2</sub>(dba)<sub>3</sub>•CHCl<sub>3</sub> (13.4 mg, 13  $\mu\text{mol}$ , 1.5 eq.), and *t*-Bu<sub>3</sub>P (114  $\mu\text{L}$ , 57  $\mu\text{mol}$ , as 0.5 mol L<sup>-1</sup> stock solution in THF, 6.6 eq.) in a mixture of THF (248 mL), K<sub>3</sub>PO<sub>4</sub> (8.2 mg, 39  $\mu\text{mol}$ , 4.5 e.q.), and deionized water (50  $\mu\text{L}$ ). The final product ((**PCL-*b*-PF**)<sub>3</sub>) was obtained as a yellow solid.

#### ((**PCL-*b*-PF**)<sub>3</sub>)

87.9 mg, 82.6% yield: Yellow solid.  $M_{n,SEC} = 15,300 \text{ g mol}^{-1}$  (THF);  $M_{n,NMR} = 17,100 \text{ g mol}^{-1}$  (CDCl<sub>3</sub>),  $D_M = 1.07$ .

<sup>1</sup>H NMR (400 MHz, CDCl<sub>3</sub>):  $\delta$  (ppm) 7.93–7.74 (m, Ar-*H*), 7.75–7.57 (m, Ar-*H*), 7.50 (d, Ar-*H*), 4.30 (t, -CH<sub>2</sub>OBz-I), 4.06 (t, -COCH<sub>2</sub>-), 2.31 (t, -C(=O)CH<sub>2</sub>-), 1.89–1.55 (m, -C(=O)CH<sub>2</sub>CH<sub>2</sub>CH<sub>2</sub>CH<sub>2</sub>CH<sub>2</sub>O-), 2.12 (br, -CH<sub>2</sub>(CH<sub>2</sub>)<sub>4</sub>CH<sub>3</sub>), 1.60–1.70 (m, -COCH<sub>2</sub>CH<sub>2</sub>(CH<sub>2</sub>)<sub>2</sub>CH<sub>2</sub>CH<sub>2</sub>O-), 1.38 (m, -CO(CH<sub>2</sub>)<sub>2</sub>CH<sub>2</sub>(CH<sub>2</sub>)<sub>2</sub>O-, -CH<sub>3</sub>), 1.36–0.66 (m, -CH<sub>2</sub>(CH<sub>2</sub>)<sub>4</sub>CH<sub>3</sub>).

## Synthesis of PF-containing graft copolymer using macroinitiator

### Scheme S19. Synthesis of PF-containing graft copolymer by SCTP using poly(*n*-butyl acrylate) possessing iodobenzene side chain as the macroinitiator

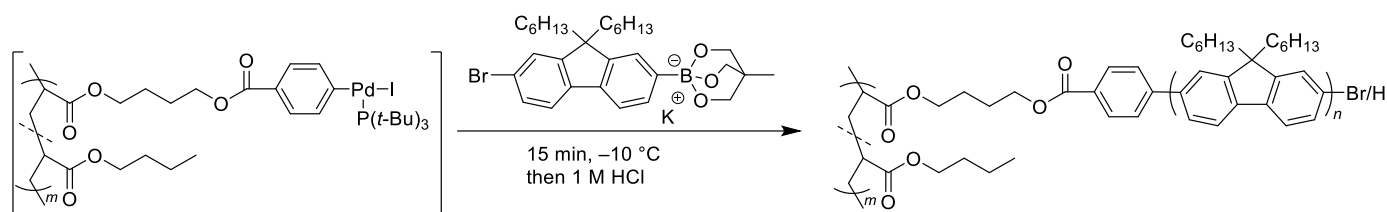

The PF-containing graft copolymer was synthesized by the SCTP of **M1** (10.4 mL, 2.59 mmol, as 0.25 mol L<sup>-1</sup> stock solution in THF) with the poly(*n*-butyl acrylate) possessing iodobenzene side chain (**P(BA<sub>50-co-BzI4</sub>)**;  $M_{n,NMR} = 8,100 \text{ g mol}^{-1}$ ,  $D_M = 1.09$ ) as the macroinitiator (52.6 mg, 86.3  $\mu\text{mol}$ , 1.0 eq.), Pd<sub>2</sub>(dba)<sub>3</sub>•CHCl<sub>3</sub> (26.8 mg, 25.9  $\mu\text{mol}$ , 2.0 eq.), and *t*-Bu<sub>3</sub>P (114  $\mu\text{L}$ , 57  $\mu\text{mol}$ , as 0.5 mol L<sup>-1</sup> stock solution in THF, 8.8 eq.) in a mixture of THF (248 mL), K<sub>3</sub>PO<sub>4</sub> (8.2 mg, 39  $\mu\text{mol}$ , 6.0 e.q.), and deionized water (25  $\mu\text{L}$ ). The final product (**PBA-g-PF**) was obtained as a yellow solid.

### PBA-g-PF

76.3 mg, 75.3% yield: Yellow solid.  $M_{n,SEC} = 14,900 \text{ g mol}^{-1}$  (THF);  $M_{n,NMR} = 21,300 \text{ g mol}^{-1}$  (CDCl<sub>3</sub>),  $D_M = 1.08$ .

<sup>1</sup>H NMR (400 MHz, CDCl<sub>3</sub>):  $\delta$  (ppm) 7.93–7.74 (m, Ar-*H*), 7.75–7.57 (m, Ar-*H*), 7.50 (d, Ar-*H*), 4.06 (t, –COCH<sub>2</sub>–), 4.35 (t, –CH<sub>2</sub>OBz–), 4.04 (t, –C(=O)OCH<sub>2</sub>CH<sub>2</sub>–), 2.28 (br, –CH<sub>2</sub>CH–), 2.12 (br, –CH<sub>2</sub>(CH<sub>2</sub>)<sub>4</sub>CH<sub>3</sub>), 1.92 (br, –CH<sub>2</sub>CH–), 1.60–1.38 (m, –(CH<sub>2</sub>)<sub>2</sub>–), 1.36–0.66 (m, –CH<sub>2</sub>(CH<sub>2</sub>)<sub>4</sub>CH<sub>3</sub>, –CH<sub>2</sub>CH<sub>3</sub>, –CH<sub>3</sub>).

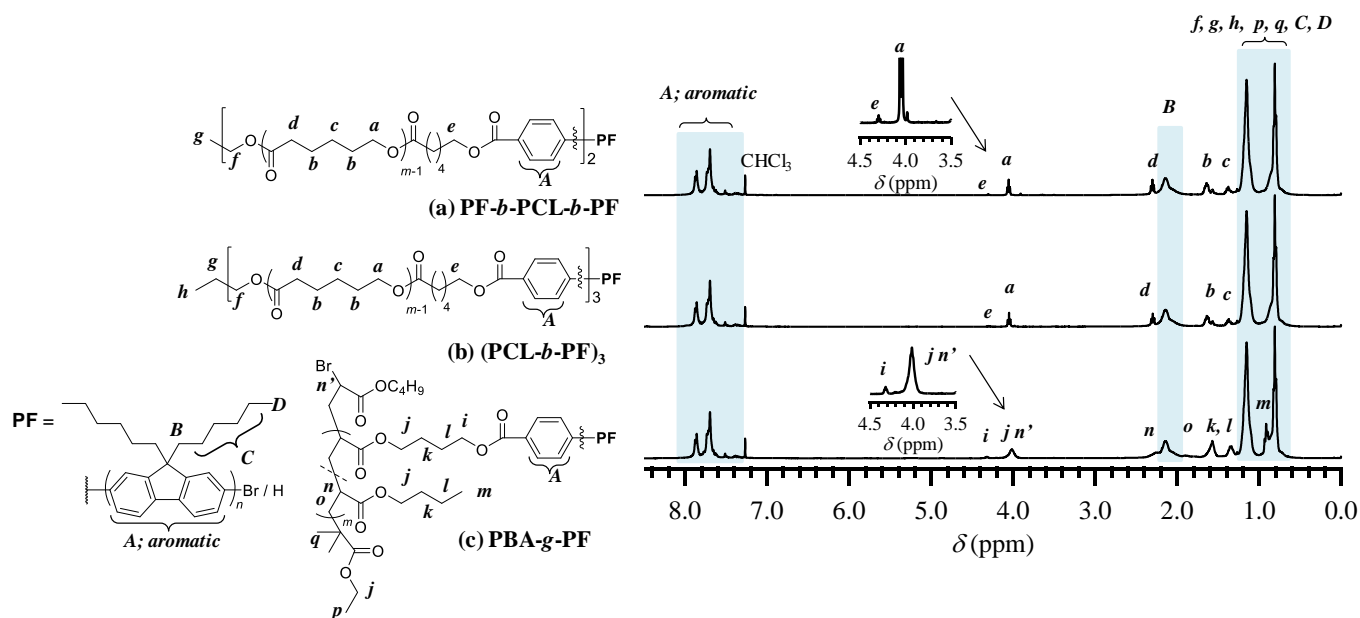

Figure S6. <sup>1</sup>H NMR spectra of (a) PF-*b*-PCL-*b*-PF, (b) (PCL-*b*-PF)<sub>3</sub>, and (c) PBA-*g*-PF (solvent, CDCl<sub>3</sub>).

## Reference and notes

1. A. Yokoyama, H. Suzuki, Y. Kubota, K. Ohuchi, H. Higashimura, and T. Yokozawa, *J. Am. Chem. Soc.*, **2007**, 129, 7236–7237.
2. S. Zalesskiy and V. P. Ananikov, *Organometallics*, **2012**, 31, 2302–2309.
